# Supplementary material for: MukB ATPases are regulated independently by the N- and C-terminal domains of MukF kleisin
Source: eLife journal article supplement (doi:10.7554/elife.31522), 2018-01-11
Supplement: supp [file elife-31522-supp-v1.zip]

Archive with 24 entries (24 files):
- elife_poa_e31522_Figure_3_figure_supplement_2.pdf
- elife_poa_e31522_Figure_4_source_data_1.xlsx
- elife_poa_e31522_Figure_3_figure_supplement_1.pdf
- elife_poa_e31522_Figure_5_figure_supplement_4_source_data_1.xlsx
- elife_poa_e31522_Figure_8_figure_supplement_1.pdf
- elife_poa_e31522_Figure_3_figure_supplement_3_source_data_1.xlsx
- elife_poa_e31522_Figure_6_figure_supplement_1_source_data_1.xlsx
- elife_poa_e31522_Figure_5_figure_supplement_4.pdf
- elife_poa_e31522_Figure_5_source_data_1.xlsx
- elife_poa_e31522_Figure_5_figure_supplement_6.pdf
- elife_poa_e31522_Transparent_Reporting_File.pdf
- elife_poa_e31522_Figure_5_figure_supplement_3_source_data_1.xlsx
- elife_poa_e31522_Figure_5_figure_supplement_1.pdf
- elife_poa_e31522_Figure_5_figure_supplement_5.pdf
- elife_poa_e31522_Figure_4_figure_supplement_1_source_data_1.xlsx
- elife_poa_e31522_Figure_8_figure_supplement_2.pdf
- elife_poa_e31522_Figure_7_figure_supplement_1.pdf
- elife_poa_e31522_Figure_5_figure_supplement_3.pdf
- elife_poa_e31522_Figure_8_source_data_1.xlsx
- elife_poa_e31522_Figure_3_figure_supplement_3.pdf
- elife_poa_e31522_Figure_5_figure_supplement_2.pdf
- elife_poa_e31522_Figure_6_figure_supplement_1.pdf
- elife_poa_e31522_Figure_4_figure_supplement_1.pdf
- elife_poa_e31522_Figure_6_source_data_1.xlsx
