# Supplementary material for: MukB ATPases are regulated independently by the N- and C-terminal domains of MukF kleisin
Source: eLife journal article supplement (doi:10.7554/elife.31522), 2018-01-11
Supplement: supp [file elife-31522-supp-v1.zip › elife_poa_e31522_Figure_3_figure_supplement_3_source_data_1.xlsx]

## Sheet: Sheet1
200	74.9	200	87.4	23.6237	88	83.4333	7.39617	100.001	8.86482
100	69.5	100	82.7	25.8842	85.3	79.1667	8.47191	92.9714	9.94921
50	63.9	50	79.1	28.0027	82.5	75.1667	9.90421	86.3817	11.3819
25	59.8	25	64.3	29.9922	68	64.0333	4.1065	68.0401	4.36345
12.5	48.6	12.5	45.9	31.8641	48.7	47.7333	1.5885	41.1867	1.37064
6.25	43.6	6.25	24.2	33.6286	30.3	32.7	9.92018	16.4201	4.98136
3.125	43.9	3.125	16.9	35.2946	20.9	27.2333	14.5717	7.41406	3.96702
1.5625	39.4	1.5625	10.3	36.8703	18.5	22.7333	15.0048	0.000549149	0.000362457
0.78125	36.6	0.78125	13.1	38.3626	17.9	22.5333	12.4163	-0.32894	-0.181252
0.390625	35.7	0.390625	16.3	39.7781	23.5	25.1667	9.8068	4.00934	1.56233
0.195312	45.7	0.195312	26.5	41.1226	32.3	34.8333	9.8475	3.46019	1.37212
