# Supplementary material for: MukB ATPases are regulated independently by the N- and C-terminal domains of MukF kleisin
Source: eLife journal article supplement (doi:10.7554/elife.31522), 2018-01-11
Supplement: supp [file elife-31522-supp-v1.zip › elife_poa_e31522_Figure_4_figure_supplement_1_source_data_1.xlsx]

## Sheet: A
Time (seconds)	F	0.5B:0.25F	0.5B:0.5F	0.5B:1.25F	0.5B:2.5F	0.5B:5F
0	-0.087	-0.007	-0.052	-0.105	-0.096	-0.086
30	-0.1	0.013	-0.026	-0.059	-0.086	-0.067
60	-0.095	0.034	-0.005	-0.039	-0.053	-0.037
90	-0.095	0.054	0.004	-0.023	-0.02	-0.012
120	-0.078	0.078	0.029	0.005	0.007	0.01
150	-0.089	0.088	0.045	0.026	0.028	0.031
180	-0.072	0.118	0.075	0.06	0.049	0.071
210	-0.076	0.138	0.104	0.093	0.08	0.108
240	-0.064	0.149	0.129	0.12	0.106	0.134
270	-0.065	0.171	0.151	0.147	0.132	0.168
300	-0.065	0.194	0.176	0.176	0.162	0.2
330	-0.05	0.22	0.21	0.214	0.205	0.237
360	-0.051	0.24	0.245	0.248	0.23	0.272
390	-0.057	0.26	0.27	0.266	0.264	0.297
420	-0.051	0.286	0.296	0.292	0.294	0.33
450	-0.049	0.318	0.324	0.323	0.325	0.353
480	-0.045	0.349	0.359	0.361	0.359	0.395
510	-0.036	0.377	0.386	0.388	0.389	0.423
540	-0.036	0.399	0.415	0.416	0.412	0.443
570	-0.041	0.425	0.441	0.44	0.445	0.481
600	-0.036	0.455	0.476	0.473	0.475	0.512
630	-0.035	0.501	0.507	0.503	0.511	0.538
660	-0.038	0.523	0.534	0.528	0.535	0.565
690	-0.039	0.546	0.564	0.557	0.565	0.598
720	-0.024	0.581	0.605	0.591	0.602	0.639
750	-0.025	0.604	0.639	0.615	0.628	0.667
780	-0.027	0.627	0.671	0.652	0.662	0.7
810	-0.026	0.645	0.694	0.676	0.687	0.724
840	-0.026	0.669	0.722	0.7	0.718	0.746
870	-0.023	0.698	0.752	0.727	0.75	0.784
900	-0.022	0.724	0.788	0.759	0.776	0.811
930	-0.02	0.754	0.812	0.785	0.805	0.846
960	-0.021	0.772	0.845	0.818	0.84	0.865
990	-0.022	0.801	0.871	0.835	0.867	0.895
1020	-0.02	0.818	0.895	0.864	0.889	0.924
1050	-0.025	0.845	0.915	0.882	0.912	0.94
1080	-0.019	0.872	0.947	0.915	0.938	0.967
1110	-0.022	0.891	0.966	0.935	0.961	0.994
1140	-0.017	0.913	0.996	0.958	0.986	1.013
1170	-0.019	0.938	1.012	0.976	1.017	1.039
1200	-0.015	0.959	1.036	1.005	1.034	1.058
1230	-0.021	0.977	1.051	1.02	1.05	1.084
1260	-0.023	0.992	1.07	1.032	1.063	1.094
1290	-0.017	1.02	1.09	1.054	1.097	1.114
1320	-0.02	1.034	1.1	1.074	1.107	1.126
1350	-0.02	1.055	1.115	1.088	1.12	1.139
1380	-0.018	1.077	1.129	1.099	1.14	1.158
1410	-0.022	1.082	1.136	1.115	1.146	1.164
1440	-0.025	1.097	1.14	1.119	1.157	1.171
1470	-0.024	1.116	1.157	1.132	1.176	1.181
1500	-0.024	1.127	1.159	1.142	1.173	1.191
1530	-0.022	1.138	1.158	1.145	1.179	1.199
1560	-0.013	1.152	1.172	1.156	1.195	1.209
1590	-0.022	1.157	1.179	1.155	1.196	1.211
1620	-0.017	1.158	1.169	1.16	1.195	1.214
1650	-0.015	1.174	1.185	1.175	1.21	1.223
1680	-0.025	1.172	1.178	1.168	1.199	1.223
1710	-0.026	1.183	1.181	1.174	1.209	1.222
1740	-0.023	1.19	1.184	1.174	1.215	1.226
1770	-0.026	1.187	1.181	1.173	1.204	1.229
1800	-0.025	1.191	1.185	1.179	1.213	1.23
1830	-0.03	1.194	1.185	1.174	1.21	1.227
1860	-0.027	1.198	1.187	1.18	1.208	1.235
1890	-0.022	1.205	1.188	1.183	1.211	1.234
1920	-0.022	1.198	1.192	1.184	1.214	1.236
1950	-0.021	1.198	1.19	1.18	1.218	1.233
1980	-0.027	1.201	1.184	1.181	1.214	1.234
2010	-0.029	1.201	1.183	1.173	1.216	1.232
2040	-0.026	1.199	1.184	1.173	1.217	1.228
2070	-0.028	1.204	1.182	1.17	1.225	1.225
2100	-0.027	1.199	1.179	1.176	1.234	1.228
2130	-0.024	1.2	1.181	1.174	1.233	1.225
2160	-0.03	1.201	1.18	1.176	1.233	1.228
2190	-0.03	1.2	1.186	1.178	1.233	1.226
2220	-0.027	1.203	1.183	1.175	1.232	1.233
2250	-0.033	1.193	1.172	1.174	1.226	1.22
2280	-0.031	1.194	1.176	1.171	1.218	1.227
2310	-0.034	1.195	1.172	1.171	1.219	1.221
2340	-0.026	1.199	1.176	1.176	1.219	1.223
2370	-0.03	1.195	1.177	1.172	1.223	1.223
2400	-0.027	1.191	1.176	1.175	1.213	1.224
2430	-0.033	1.191	1.169	1.17	1.198	1.217
2460	-0.031	1.197	1.173	1.168	1.205	1.221
2490	-0.027	1.197	1.168	1.173	1.2	1.219
2520	-0.035	1.185	1.163	1.163	1.196	1.216
2550	-0.033	1.189	1.17	1.169	1.198	1.215
2580	-0.03	1.197	1.169	1.169	1.203	1.218
2610	-0.033	1.193	1.166	1.164	1.198	1.217
2640	-0.036	1.197	1.166	1.169	1.194	1.214
2670	-0.038	1.199	1.168	1.168	1.199	1.215
2700	-0.033	1.192	1.168	1.163	1.199	1.215
2730	-0.031	1.199	1.164	1.163	1.201	1.214
2760	-0.035	1.199	1.167	1.165	1.194	1.21
2790	-0.037	1.197	1.159	1.161	1.188	1.21
2820	-0.036	1.2	1.168	1.164	1.194	1.213
2850	-0.033	1.192	1.165	1.165	1.193	1.207
2880	-0.033	1.196	1.167	1.166	1.19	1.215
2910	-0.039	1.197	1.162	1.163	1.194	1.213
2940	-0.04	1.19	1.161	1.156	1.191	1.209
2970	-0.037	1.186	1.158	1.16	1.193	1.211
3000	-0.038	1.188	1.17	1.165	1.187	1.213
3030	-0.044	1.183	1.164	1.161	1.193	1.211
3060	-0.036	1.193	1.162	1.166	1.193	1.218
3090	-0.041	1.185	1.163	1.169	1.195	1.216
3120	-0.04	1.185	1.161	1.159	1.188	1.208
3150	-0.044	1.186	1.162	1.16	1.189	1.212
3180	-0.042	1.185	1.16	1.163	1.187	1.211
3210	-0.043	1.183	1.156	1.152	1.182	1.208
3240	-0.04	1.183	1.159	1.162	1.186	1.208
3270	-0.031	1.19	1.168	1.17	1.193	1.222
3300	-0.038	1.186	1.168	1.167	1.192	1.216
3330	-0.034	1.19	1.169	1.167	1.195	1.219
3360	-0.037	1.182	1.168	1.168	1.194	1.213
3390	-0.035	1.184	1.166	1.17	1.19	1.215
3420	-0.043	1.178	1.156	1.157	1.181	1.208
3450	-0.055	1.166	1.148	1.152	1.175	1.198
3480	-0.061	1.155	1.135	1.136	1.16	1.185
3510	-0.081	1.139	1.118	1.127	1.143	1.171
3540	-0.085	1.14	1.119	1.122	1.144	1.166
3570	-0.076	1.143	1.124	1.128	1.149	1.175
3600	-0.056	1.161	1.144	1.144	1.164	1.188
3630	-0.058	1.164	1.145	1.142	1.175	1.194
3660	-0.041	1.178	1.165	1.159	1.186	1.206
3690	-0.035	1.176	1.168	1.162	1.185	1.211
3720	-0.038	1.181	1.159	1.161	1.187	1.207
3750	-0.035	1.176	1.16	1.161	1.192	1.205
3780	-0.036	1.181	1.16	1.159	1.186	1.205
3810	-0.037	1.178	1.158	1.163	1.187	1.208
3840	-0.037	1.18	1.157	1.162	1.186	1.202
3870	-0.031	1.186	1.155	1.159	1.184	1.202
3900	-0.035	1.182	1.16	1.162	1.189	1.2
3930	-0.036	1.183	1.156	1.154	1.18	1.199
3960	-0.026	1.191	1.16	1.161	1.184	1.201
3990	-0.033	1.182	1.155	1.156	1.18	1.2
4020	-0.037	1.176	1.15	1.152	1.177	1.191
4050	-0.036	1.18	1.146	1.155	1.179	1.19
4080	-0.037	1.178	1.148	1.153	1.173	1.195
4110	-0.032	1.179	1.151	1.151	1.182	1.194
4140	-0.033	1.174	1.148	1.152	1.177	1.191
4170	-0.043	1.169	1.147	1.15	1.171	1.187
4200	-0.032	1.177	1.147	1.154	1.181	1.196
4230	-0.032	1.167	1.145	1.156	1.177	1.195
4260	-0.042	1.168	1.142	1.147	1.177	1.193
4290	-0.027	1.175	1.148	1.151	1.18	1.196
4320	-0.041	1.17	1.138	1.146	1.175	1.189
4350	-0.042	1.168	1.139	1.15	1.177	1.192
4380	-0.035	1.178	1.145	1.149	1.178	1.193
4410	-0.038	1.172	1.143	1.144	1.174	1.19
4440	-0.039	1.177	1.14	1.146	1.175	1.192
4470	-0.041	1.173	1.133	1.138	1.164	1.187
4500	-0.042	1.168	1.133	1.133	1.167	1.182
4530	-0.036	1.176	1.139	1.139	1.169	1.184
4560	-0.037	1.167	1.143	1.142	1.169	1.189
4590	-0.039	1.164	1.141	1.135	1.16	1.187
4620	-0.041	1.156	1.137	1.136	1.164	1.182
4650	-0.034	1.158	1.135	1.132	1.166	1.179
4680	-0.032	1.161	1.141	1.138	1.168	1.182
4710	-0.032	1.162	1.134	1.14	1.168	1.184
4740	-0.033	1.161	1.137	1.132	1.166	1.188
4770	-0.031	1.16	1.133	1.124	1.164	1.174
4800	-0.029	1.161	1.136	1.132	1.166	1.184
4830	-0.031	1.162	1.136	1.133	1.167	1.185
4860	-0.037	1.154	1.13	1.127	1.161	1.172
4890	-0.037	1.154	1.124	1.124	1.167	1.169
4920	-0.036	1.153	1.125	1.126	1.158	1.168
4950	-0.033	1.15	1.127	1.12	1.156	1.176
4980	-0.035	1.146	1.123	1.122	1.159	1.174
5010	-0.037	1.151	1.127	1.128	1.159	1.168
5040	-0.034	1.152	1.126	1.122	1.163	1.178
5070	-0.041	1.149	1.126	1.125	1.16	1.171
5100	-0.035	1.146	1.126	1.119	1.161	1.172
5130	-0.04	1.146	1.123	1.126	1.158	1.164
5160	-0.039	1.145	1.118	1.121	1.16	1.169
5190	-0.044	1.142	1.122	1.116	1.161	1.167
5220	-0.042	1.146	1.12	1.119	1.166	1.17
5250	-0.044	1.143	1.126	1.123	1.159	1.165
5280	-0.051	1.144	1.122	1.117	1.164	1.162
5310	-0.045	1.139	1.117	1.12	1.162	1.167
5340	-0.045	1.144	1.122	1.122	1.161	1.169
5370	-0.055	1.135	1.116	1.117	1.152	1.16

## Sheet: B
Time (seconds)	0.5B:1.25FN2	0.5B:2.5FN2	0.5B:5FN2
0	-0.003	-0.009	-0.026
30	0.014	0.002	-0.008
60	0.007	0.001	-0.014
90	0.012	-0.003	-0.017
120	0.012	0.001	-0.012
150	0.012	-0.001	-0.018
180	0.01	0.002	-0.007
210	0.028	0.012	0.001
240	0.019	0.01	-0.002
270	0.035	0.022	0.017
300	0.038	0.031	0.011
330	0.044	0.04	0.02
360	0.046	0.041	0.025
390	0.042	0.048	0.025
420	0.05	0.055	0.031
450	0.052	0.058	0.033
480	0.049	0.059	0.036
510	0.055	0.066	0.042
540	0.058	0.07	0.046
570	0.066	0.073	0.043
600	0.071	0.08	0.049
630	0.078	0.087	0.058
660	0.082	0.088	0.061
690	0.087	0.096	0.078
720	0.092	0.097	0.071
750	0.097	0.107	0.079
780	0.098	0.108	0.08
810	0.1	0.117	0.096
840	0.104	0.118	0.098
870	0.106	0.126	0.096
900	0.113	0.131	0.106
930	0.117	0.137	0.111
960	0.131	0.152	0.123
990	0.134	0.157	0.132
1020	0.137	0.163	0.137
1050	0.146	0.164	0.144
1080	0.151	0.183	0.144
1110	0.153	0.193	0.153
1140	0.16	0.204	0.161
1170	0.17	0.207	0.167
1200	0.176	0.212	0.181
1230	0.179	0.216	0.189
1260	0.185	0.219	0.195
1290	0.193	0.237	0.205
1320	0.203	0.24	0.212
1350	0.206	0.25	0.223
1380	0.216	0.261	0.231
1410	0.23	0.272	0.246
1440	0.236	0.279	0.251
1470	0.245	0.291	0.261
1500	0.255	0.308	0.275
1530	0.267	0.316	0.29
1560	0.267	0.319	0.293
1590	0.28	0.338	0.308
1620	0.291	0.352	0.324
1650	0.297	0.364	0.327
1680	0.306	0.368	0.334
1710	0.319	0.389	0.353
1740	0.324	0.393	0.36
1770	0.34	0.408	0.374
1800	0.347	0.421	0.383
1830	0.359	0.436	0.393
1860	0.372	0.447	0.417
1890	0.378	0.464	0.425
1920	0.39	0.474	0.429
1950	0.405	0.488	0.449
1980	0.418	0.503	0.458
2010	0.423	0.508	0.467
2040	0.44	0.531	0.485
2070	0.448	0.543	0.497
2100	0.46	0.556	0.507
2130	0.475	0.572	0.522
2160	0.481	0.582	0.528
2190	0.491	0.593	0.537
2220	0.504	0.601	0.553
2250	0.526	0.627	0.577
2280	0.53	0.638	0.59
2310	0.553	0.657	0.6
2340	0.556	0.663	0.616
2370	0.576	0.676	0.626
2400	0.578	0.689	0.633
2430	0.59	0.703	0.646
2460	0.606	0.719	0.665
2490	0.62	0.729	0.682
2520	0.639	0.751	0.698
2550	0.643	0.759	0.702
2580	0.655	0.774	0.714
2610	0.664	0.792	0.732
2640	0.677	0.801	0.741
2670	0.694	0.812	0.758
2700	0.7	0.826	0.765
2730	0.717	0.842	0.784
2760	0.732	0.852	0.797
2790	0.745	0.87	0.814
2820	0.756	0.882	0.822
2850	0.768	0.889	0.833
2880	0.786	0.908	0.845
2910	0.794	0.917	0.859
2940	0.805	0.926	0.875
2970	0.807	0.931	0.878
3000	0.827	0.946	0.887
3030	0.844	0.961	0.899
3060	0.853	0.97	0.911
3090	0.863	0.977	0.92
3120	0.868	0.988	0.924
3150	0.886	0.999	0.943
3180	0.888	1.004	0.951
3210	0.91	1.021	0.953
3240	0.907	1.014	0.956
3270	0.901	1	0.949
3300	0.908	1.008	0.952
3330	0.908	1.008	0.958
3360	0.938	1.031	0.981
3390	0.956	1.049	0.996
3420	0.965	1.063	1.012
3450	0.974	1.067	1.018
3480	0.989	1.068	1.024
3510	0.996	1.07	1.021
3540	1.009	1.08	1.034
3570	1.014	1.08	1.036
3600	1.022	1.088	1.042
3630	1.026	1.089	1.047
3660	1.035	1.093	1.045
3690	1.041	1.094	1.057
3720	1.044	1.096	1.057
3750	1.05	1.104	1.064
3780	1.047	1.103	1.06
3810	1.057	1.105	1.069
3840	1.059	1.105	1.068
3870	1.065	1.109	1.073
3900	1.062	1.114	1.07
3930	1.071	1.11	1.07
3960	1.071	1.104	1.077
3990	1.08	1.113	1.078
4020	1.072	1.108	1.078
4050	1.082	1.118	1.08
4080	1.087	1.113	1.08
4110	1.079	1.113	1.079
4140	1.082	1.116	1.082
4170	1.088	1.117	1.076
4200	1.083	1.106	1.079
4230	1.081	1.116	1.083
4260	1.093	1.113	1.081
4290	1.082	1.114	1.069
4320	1.086	1.115	1.082
4350	1.089	1.114	1.08
4380	1.089	1.105	1.079
4410	1.09	1.114	1.085
4440	1.09	1.109	1.082
4470	1.089	1.112	1.084
4500	1.088	1.115	1.078
4530	1.083	1.112	1.077
4560	1.079	1.108	1.078
4590	1.081	1.102	1.074
4620	1.085	1.111	1.079
4650	1.085	1.104	1.078
4680	1.084	1.104	1.076
4710	1.087	1.102	1.075
4740	1.085	1.1	1.07
4770	1.087	1.108	1.077
4800	1.09	1.102	1.079
4830	1.092	1.108	1.082
4860	1.089	1.105	1.08
4890	1.093	1.098	1.077
4920	1.093	1.104	1.077
4950	1.093	1.102	1.078
4980	1.094	1.105	1.08
5010	1.096	1.099	1.08
5040	1.095	1.107	1.08
5070	1.093	1.099	1.076
5100	1.095	1.102	1.075
5130	1.089	1.103	1.077
5160	1.1	1.105	1.08
5190	1.092	1.099	1.075
5220	1.095	1.098	1.078
5250	1.095	1.103	1.078
5280	1.093	1.093	1.077
5310	1.099	1.097	1.078
5340	1.098	1.096	1.076
5370	1.095	1.093	1.079

## Sheet: C
Time (seconds)	0.5B:1.25FC2	0.5B:2.5FC2	0.5B:5FC2
0	-0.03	-0.013	-0.046
30	-0.02	-0.004	-0.027
60	-0.018	0.001	-0.005
90	-0.011	0.007	0.006
120	-0.008	0.021	0.027
150	-0.003	0.045	0.043
180	0.007	0.075	0.061
210	0.024	0.101	0.09
240	0.031	0.107	0.098
270	0.057	0.129	0.127
300	0.065	0.144	0.143
330	0.09	0.16	0.159
360	0.105	0.176	0.182
390	0.123	0.187	0.192
420	0.139	0.203	0.212
450	0.155	0.216	0.219
480	0.17	0.23	0.238
510	0.19	0.249	0.254
540	0.209	0.271	0.266
570	0.23	0.28	0.27
600	0.255	0.301	0.286
630	0.274	0.33	0.307
660	0.288	0.347	0.321
690	0.313	0.378	0.337
720	0.333	0.402	0.346
750	0.352	0.428	0.366
780	0.371	0.448	0.374
810	0.395	0.472	0.397
840	0.415	0.495	0.412
870	0.436	0.5	0.424
900	0.454	0.496	0.444
930	0.468	0.495	0.454
960	0.506	0.531	0.475
990	0.522	0.534	0.489
1020	0.543	0.558	0.511
1050	0.566	0.573	0.528
1080	0.579	0.582	0.54
1110	0.6	0.604	0.557
1140	0.626	0.619	0.573
1170	0.637	0.631	0.586
1200	0.67	0.659	0.607
1230	0.677	0.67	0.621
1260	0.694	0.677	0.638
1290	0.719	0.7	0.654
1320	0.735	0.71	0.673
1350	0.744	0.722	0.684
1380	0.76	0.734	0.706
1410	0.784	0.761	0.714
1440	0.8	0.772	0.736
1470	0.812	0.795	0.749
1500	0.832	0.813	0.768
1530	0.846	0.827	0.792
1560	0.86	0.833	0.794
1590	0.873	0.851	0.815
1620	0.885	0.862	0.826
1650	0.904	0.875	0.843
1680	0.911	0.887	0.857
1710	0.929	0.908	0.873
1740	0.933	0.913	0.887
1770	0.956	0.927	0.903
1800	0.963	0.937	0.916
1830	0.976	0.956	0.924
1860	0.988	0.97	0.943
1890	1	0.985	0.959
1920	1.007	0.993	0.968
1950	1.025	1.008	0.986
1980	1.03	1.012	0.998
2010	1.042	1.018	1
2040	1.049	1.033	1.013
2070	1.054	1.041	1.03
2100	1.077	1.051	1.044
2130	1.077	1.059	1.051
2160	1.083	1.061	1.052
2190	1.083	1.067	1.063
2220	1.094	1.072	1.07
2250	1.111	1.089	1.09
2280	1.108	1.094	1.095
2310	1.118	1.099	1.103
2340	1.117	1.103	1.116
2370	1.123	1.105	1.129
2400	1.124	1.103	1.134
2430	1.135	1.12	1.145
2460	1.132	1.13	1.156
2490	1.14	1.136	1.162
2520	1.143	1.14	1.165
2550	1.142	1.131	1.158
2580	1.141	1.125	1.158
2610	1.147	1.124	1.147
2640	1.142	1.125	1.144
2670	1.15	1.126	1.136
2700	1.146	1.125	1.138
2730	1.155	1.137	1.142
2760	1.146	1.133	1.14
2790	1.158	1.131	1.146
2820	1.148	1.128	1.139
2850	1.145	1.126	1.144
2880	1.152	1.134	1.147
2910	1.146	1.143	1.144
2940	1.152	1.153	1.144
2970	1.14	1.157	1.138
3000	1.148	1.177	1.136
3030	1.151	1.184	1.146
3060	1.148	1.179	1.149
3090	1.149	1.176	1.147
3120	1.139	1.158	1.134
3150	1.154	1.16	1.15
3180	1.146	1.15	1.139
3210	1.143	1.145	1.132
3240	1.136	1.136	1.13
3270	1.114	1.117	1.117
3300	1.116	1.113	1.11
3330	1.108	1.112	1.108
3360	1.125	1.131	1.123
3390	1.133	1.142	1.133
3420	1.137	1.148	1.133
3450	1.138	1.163	1.136
3480	1.138	1.15	1.136
3510	1.144	1.134	1.133
3540	1.143	1.127	1.144
3570	1.137	1.122	1.133
3600	1.138	1.127	1.136
3630	1.141	1.119	1.136
3660	1.139	1.123	1.141
3690	1.143	1.121	1.132
3720	1.14	1.121	1.133
3750	1.141	1.124	1.136
3780	1.14	1.122	1.137
3810	1.138	1.126	1.14
3840	1.143	1.126	1.14
3870	1.14	1.128	1.142
3900	1.141	1.12	1.134
3930	1.141	1.122	1.136
3960	1.138	1.117	1.13
3990	1.138	1.121	1.136
4020	1.138	1.121	1.134
4050	1.136	1.123	1.137
4080	1.135	1.122	1.141
4110	1.132	1.117	1.128
4140	1.135	1.12	1.132
4170	1.139	1.12	1.132
4200	1.132	1.114	1.133
4230	1.138	1.116	1.135
4260	1.134	1.118	1.135
4290	1.127	1.113	1.125
4320	1.132	1.118	1.127
4350	1.128	1.12	1.132
4380	1.131	1.122	1.127
4410	1.136	1.123	1.129
4440	1.129	1.126	1.125
4470	1.133	1.126	1.134
4500	1.138	1.123	1.132
4530	1.126	1.116	1.122
4560	1.125	1.121	1.126
4590	1.122	1.116	1.119
4620	1.129	1.122	1.123
4650	1.125	1.117	1.123
4680	1.123	1.113	1.12
4710	1.121	1.114	1.119
4740	1.12	1.115	1.117
4770	1.122	1.118	1.122
4800	1.117	1.121	1.124
4830	1.124	1.124	1.126
4860	1.122	1.118	1.124
4890	1.124	1.118	1.116
4920	1.123	1.124	1.121
4950	1.123	1.123	1.122
4980	1.125	1.129	1.122
5010	1.126	1.13	1.122
5040	1.129	1.13	1.122
5070	1.124	1.141	1.121
5100	1.122	1.145	1.123
5130	1.122	1.123	1.116
5160	1.125	1.116	1.123
5190	1.123	1.103	1.116
5220	1.13	1.107	1.12
5250	1.124	1.111	1.118
5280	1.124	1.098	1.112
5310	1.121	1.105	1.112
5340	1.116	1.104	1.115
	1.118	1.101	1.117

## Sheet: D
Time (seconds)	B:FN6	B:F
0	-0.015	0.038
30	0.005	0.038
60	0.001	0.019
90	-0.001	0.013
120	-0.008	-0.002
150	-0.006	0.003
180	-0.009	0.003
210	-0.004	0.011
240	-0.001	0.021
270	0.004	0.036
300	0.027	0.067
330	0.032	0.073
360	0.031	0.093
390	0.043	0.112
420	0.047	0.123
450	0.045	0.133
480	0.048	0.151
510	0.056	0.174
540	0.057	0.185
570	0.054	0.204
600	0.052	0.216
630	0.044	0.235
660	0.051	0.258
690	0.049	0.279
720	0.048	0.296
750	0.04	0.319
780	0.043	0.345
810	0.043	0.367
840	0.039	0.387
870	0.043	0.416
900	0.04	0.433
930	0.038	0.463
960	0.04	0.49
990	0.045	0.514
1020	0.041	0.533
1050	0.038	0.557
1080	0.035	0.576
1110	0.034	0.598
1140	0.032	0.63
1170	0.039	0.649
1200	0.029	0.668
1230	0.032	0.692
1260	0.033	0.717
1290	0.036	0.742
1320	0.034	0.756
1350	0.033	0.781
1380	0.039	0.802
1410	0.038	0.819
1440	0.035	0.842
1470	0.035	0.857
1500	0.035	0.88
1530	0.039	0.9
1560	0.037	0.915
1590	0.038	0.936
1620	0.043	0.952
1650	0.031	0.964
1680	0.043	0.984
1710	0.038	0.995
1740	0.038	1.01
1770	0.035	1.022
1800	0.043	1.039
1830	0.04	1.048
1860	0.043	1.06
1890	0.041	1.07
1920	0.044	1.087
1950	0.045	1.098
1980	0.043	1.103
2010	0.043	1.107
2040	0.044	1.123
2070	0.045	1.13
2100	0.049	1.135
2130	0.045	1.138
2160	0.048	1.149
2190	0.051	1.154
2220	0.051	1.155
2250	0.05	1.156
2280	0.046	1.16
2310	0.047	1.164
2340	0.048	1.167
2370	0.054	1.17
2400	0.05	1.177
2430	0.055	1.18
2460	0.059	1.18
2490	0.058	1.186
2520	0.053	1.185
2550	0.059	1.188
2580	0.062	1.194
2610	0.057	1.192
2640	0.063	1.189
2670	0.056	1.186
2700	0.061	1.19
2730	0.064	1.196
2760	0.067	1.193
2790	0.066	1.195
2820	0.066	1.201
2850	0.061	1.198
2880	0.069	1.194
2910	0.065	1.204
2940	0.07	1.199
2970	0.067	1.198
3000	0.072	1.205
3030	0.071	1.207
3060	0.075	1.203
3090	0.073	1.206
3120	0.073	1.208
3150	0.064	1.203
3180	0.077	1.208
3210	0.078	1.208
3240	0.074	1.205
3270	0.076	1.211
3300	0.079	1.211
3330	0.077	1.21
3360	0.076	1.207
3390	0.079	1.211
3420	0.078	1.212
3450	0.08	1.211
3480	0.081	1.213
3510	0.085	1.215
3540	0.084	1.218
3570	0.082	1.213
3600	0.078	1.209
3630	0.087	1.216
3660	0.088	1.218
3690	0.087	1.214
3720	0.092	1.217
3750	0.092	1.222
3780	0.088	1.216
3810	0.079	1.207
3840	0.092	1.218
3870	0.089	1.22
3900	0.088	1.219
3930	0.091	1.22
3960	0.094	1.218
3990	0.097	1.222
4020	0.095	1.221
4050	0.097	1.217
4080	0.094	1.219
4110	0.096	1.223
4140	0.098	1.223
4170	0.093	1.22
4200	0.103	1.226
4230	0.099	1.222
4260	0.102	1.22
4290	0.099	1.222
4320	0.102	1.22
4350	0.097	1.221
4380	0.104	1.218
4410	0.107	1.223
4440	0.111	1.223
4470	0.107	1.225
4500	0.109	1.221
4530	0.107	1.224
4560	0.109	1.219
4590	0.112	1.222
4620	0.116	1.22
4650	0.112	1.23
4680	0.11	1.223
4710	0.112	1.223
4740	0.109	1.221
4770	0.111	1.223
4800	0.11	1.222
4830	0.11	1.22
4860	0.114	1.228
4890	0.114	1.225
4920	0.116	1.22
4950	0.117	1.225
4980	0.114	1.22
5010	0.118	1.226
5040	0.123	1.224
5070	0.117	1.22
5100	0.116	1.227
5130	0.125	1.234
5160	0.121	1.232
5190	0.118	1.223
5220	0.122	1.22
5250	0.117	1.222
5280	0.125	1.23
5310	0.125	1.228
5340	0.125	1.224
5370	0.118	1.225
