# Supplementary material for: MukB ATPases are regulated independently by the N- and C-terminal domains of MukF kleisin
Source: eLife journal article supplement (doi:10.7554/elife.31522), 2018-01-11
Supplement: supp [file elife-31522-supp-v1.zip › elife_poa_e31522_Figure_4_source_data_1.xlsx]

## Sheet: Sheet1
Time (seconds)	B:FN2	B:FC2	B:F	B:FN2:FC2
0	-0.164	-0.09	-0.105	-0.04
30	-0.139	-0.087	-0.059	-0.032
60	-0.118	-0.074	-0.039	-0.025
90	-0.106	-0.068	-0.023	-0.033
120	-0.083	-0.063	0.005	-0.019
150	-0.068	-0.047	0.026	-0.019
180	-0.048	-0.039	0.06	-0.007
210	-0.037	-0.02	0.093	-0.001
240	-0.022	-0.018	0.12	0.017
270	-0.019	-0.012	0.147	0.021
300	-0.016	-0.001	0.176	0.03
330	-0.01	0.013	0.214	0.056
360	-0.006	0.02	0.248	0.08
390	-0.002	0.027	0.266	0.081
420	-0.002	0.032	0.292	0.1
450	-0.001	0.036	0.323	0.118
480	0.005	0.046	0.361	0.142
510	0.011	0.06	0.388	0.171
540	0.009	0.067	0.416	0.191
570	0.015	0.081	0.44	0.208
600	0.021	0.089	0.473	0.237
630	0.023	0.094	0.503	0.259
660	0.027	0.102	0.528	0.281
690	0.032	0.11	0.557	0.317
720	0.044	0.125	0.591	0.354
750	0.049	0.14	0.615	0.379
780	0.049	0.15	0.652	0.405
810	0.048	0.158	0.676	0.436
840	0.052	0.174	0.7	0.465
870	0.06	0.184	0.727	0.5
900	0.068	0.201	0.759	0.537
930	0.075	0.216	0.785	0.566
960	0.079	0.229	0.818	0.601
990	0.09	0.246	0.835	0.63
1020	0.091	0.256	0.864	0.658
1050	0.093	0.269	0.882	0.685
1080	0.101	0.286	0.915	0.724
1110	0.098	0.301	0.935	0.752
1140	0.107	0.317	0.958	0.785
1170	0.109	0.329	0.976	0.814
1200	0.122	0.354	1.005	0.848
1230	0.13	0.363	1.02	0.872
1260	0.13	0.384	1.032	0.897
1290	0.144	0.404	1.054	0.928
1320	0.144	0.414	1.074	0.954
1350	0.156	0.436	1.088	0.981
1380	0.162	0.454	1.099	1.002
1410	0.169	0.472	1.115	1.026
1440	0.174	0.481	1.119	1.037
1470	0.189	0.504	1.132	1.064
1500	0.194	0.53	1.142	1.084
1530	0.203	0.54	1.145	1.09
1560	0.213	0.565	1.156	1.114
1590	0.223	0.58	1.155	1.121
1620	0.229	0.598	1.16	1.133
1650	0.246	0.62	1.175	1.152
1680	0.247	0.632	1.168	1.163
1710	0.267	0.655	1.174	1.173
1740	0.269	0.674	1.174	1.179
1770	0.276	0.685	1.173	1.174
1800	0.29	0.706	1.179	1.19
1830	0.293	0.724	1.174	1.192
1860	0.307	0.738	1.18	1.197
1890	0.322	0.769	1.183	1.2
1920	0.327	0.784	1.184	1.21
1950	0.335	0.796	1.18	1.211
1980	0.346	0.811	1.181	1.21
2010	0.346	0.826	1.173	1.207
2040	0.351	0.842	1.173	1.206
2070	0.362	0.859	1.17	1.21
2100	0.375	0.876	1.176	1.209
2130	0.383	0.893	1.174	1.209
2160	0.394	0.904	1.176	1.205
2190	0.399	0.925	1.178	1.21
2220	0.412	0.939	1.175	1.206
2250	0.414	0.953	1.174	1.201
2280	0.429	0.963	1.171	1.209
2310	0.437	0.976	1.171	1.209
2340	0.446	0.994	1.176	1.211
2370	0.46	1.001	1.172	1.211
2400	0.471	1.012	1.175	1.204
2430	0.472	1.02	1.17	1.198
2460	0.485	1.036	1.168	1.204
2490	0.495	1.044	1.173	1.208
2520	0.498	1.047	1.163	1.198
2550	0.512	1.063	1.169	1.204
2580	0.526	1.068	1.169	1.199
2610	0.53	1.074	1.164	1.198
2640	0.54	1.079	1.169	1.202
2670	0.556	1.086	1.168	1.201
2700	0.555	1.089	1.163	1.202
2730	0.572	1.097	1.163	1.2
2760	0.584	1.099	1.165	1.198
2790	0.583	1.102	1.161	1.202
2820	0.596	1.108	1.164	1.196
2850	0.609	1.112	1.165	1.196
2880	0.623	1.112	1.166	1.207
2910	0.631	1.117	1.163	1.201
2940	0.633	1.112	1.156	1.198
2970	0.648	1.114	1.16	1.198
3000	0.653	1.12	1.165	1.203
3030	0.666	1.119	1.161	1.205
3060	0.672	1.13	1.166	1.206
3090	0.682	1.13	1.169	1.204
3120	0.698	1.125	1.159	1.2
3150	0.705	1.132	1.16	1.191
3180	0.717	1.126	1.163	1.187
3210	0.726	1.121	1.152	1.183
3240	0.735	1.129	1.162	1.194
3270	0.748	1.14	1.17	1.201
3300	0.751	1.134	1.167	1.205
3330	0.759	1.133	1.167	1.206
3360	0.764	1.133	1.168	1.192
3390	0.774	1.13	1.17	1.189
3420	0.771	1.128	1.157	1.187
3450	0.771	1.115	1.152	1.172
3480	0.768	1.104	1.136	1.161
3510	0.758	1.084	1.127	1.151
3540	0.769	1.088	1.122	1.148
3570	0.778	1.092	1.128	1.143
3600	0.802	1.107	1.144	1.17
3630	0.81	1.11	1.142	1.167
3660	0.835	1.13	1.159	1.182
3690	0.845	1.132	1.162	1.182
3720	0.849	1.135	1.161	1.184
3750	0.855	1.137	1.161	1.18
3780	0.863	1.139	1.159	1.181
3810	0.866	1.144	1.163	1.18
3840	0.881	1.144	1.162	1.182
3870	0.885	1.146	1.159	1.182
3900	0.887	1.152	1.162	1.179
3930	0.893	1.142	1.154	1.171
3960	0.9	1.145	1.161	1.176
3990	0.9	1.145	1.156	1.176
4020	0.901	1.137	1.152	1.158
4050	0.914	1.143	1.155	1.164
4080	0.912	1.132	1.153	1.161
4110	0.921	1.129	1.151	1.163
4140	0.923	1.125	1.152	1.166
4170	0.925	1.113	1.15	1.169
4200	0.941	1.126	1.154	1.166
4230	0.938	1.127	1.156	1.165
4260	0.944	1.114	1.147	1.161
4290	0.946	1.121	1.151	1.169
4320	0.947	1.115	1.146	1.166
4350	0.95	1.114	1.15	1.159
4380	0.952	1.114	1.149	1.161
4410	0.956	1.115	1.144	1.16
4440	0.961	1.12	1.146	1.159
4470	0.966	1.117	1.138	1.151
4500	0.96	1.113	1.133	1.156
4530	0.963	1.11	1.139	1.158
4560	0.97	1.115	1.142	1.156
4590	0.974	1.113	1.135	1.148
4620	0.969	1.11	1.136	1.149
4650	0.972	1.109	1.132	1.154
4680	0.979	1.112	1.138	1.159
4710	0.978	1.115	1.14	1.151
4740	0.981	1.114	1.132	1.156
4770	0.977	1.103	1.124	1.15
4800	0.986	1.112	1.132	1.152
4830	0.988	1.106	1.133	1.15
4860	0.978	1.102	1.127	1.147
4890	0.98	1.1	1.124	1.145
4920	0.98	1.102	1.126	1.14
4950	0.983	1.101	1.12	1.141
4980	0.986	1.104	1.122	1.145
5010	0.987	1.102	1.128	1.144
5040	0.992	1.103	1.122	1.143
5070	0.991	1.1	1.125	1.148
5100	0.991	1.103	1.119	1.141
5130	0.987	1.106	1.126	1.141
5160	0.992	1.1	1.121	1.138
5190	0.989	1.093	1.116	1.138
5220	0.991	1.101	1.119	1.143
5250	0.992	1.096	1.123	1.139
5280	0.992	1.096	1.117	1.139
5310	0.993	1.093	1.12	1.138
5340	0.997	1.105	1.122	1.145
5370	0.987	1.096	1.117	1.13
