# Supplementary material for: MukB ATPases are regulated independently by the N- and C-terminal domains of MukF kleisin
Source: eLife journal article supplement (doi:10.7554/elife.31522), 2018-01-11
Supplement: supp [file elife-31522-supp-v1.zip › elife_poa_e31522_Figure_5_figure_supplement_3_source_data_1.xlsx]

## Sheet: Sheet1
Time (seconds)	blank	B-F	B-FN2	B-FC2	Bm1-F	Bm1-FN2	Bm1-FC2	Bm3-F	Bm3--FN2	Bm3-FC2			Time (seconds)	B-F	B-FN2	B-FC2	Bm1-F	Bm1-FN2	Bm1-FC2	Bm3-F	Bm3--FN2	Bm3-FC2
0	1.27833	1.361	1.226	1.26767	1.17533	1.212	1.198	1.2115	1.167	1.238			0	0.0826667	-0.0523333	-0.0106667	-0.103	-0.0663333	-0.0803333	-0.0668333	-0.111333	-0.0403333
30	1.278	1.386	1.24933	1.28367	1.18233	1.212	1.20733	1.2205	1.1705	1.259			30	0.108	-0.0286667	0.00566667	-0.0956667	-0.066	-0.0706667	-0.0575	-0.1075	-0.019
60	1.27933	1.40333	1.24633	1.30067	1.19433	1.20967	1.21433	1.24	1.1805	1.271			60	0.124	-0.033	0.0213333	-0.085	-0.0696667	-0.065	-0.0393333	-0.0988333	-0.00833333
90	1.275	1.425	1.25367	1.32067	1.18967	1.21733	1.221	1.251	1.184	1.284			90	0.15	-0.0213333	0.0456667	-0.0853333	-0.0576667	-0.054	-0.024	-0.091	0.009
120	1.27567	1.44133	1.253	1.332	1.19033	1.215	1.21467	1.2735	1.19	1.289			120	0.165667	-0.0226667	0.0563333	-0.0853333	-0.0606667	-0.061	-0.00216667	-0.0856667	0.0133333
150	1.28133	1.461	1.26467	1.34567	1.19733	1.22033	1.22633	1.2875	1.2	1.297			150	0.179667	-0.0166667	0.0643333	-0.084	-0.061	-0.055	0.00616667	-0.0813333	0.0156667
180	1.279	1.48233	1.27167	1.35967	1.20633	1.22667	1.22733	1.303	1.203	1.298			180	0.203333	-0.00733333	0.0806667	-0.0726667	-0.0523333	-0.0516667	0.024	-0.076	0.019
210	1.28533	1.50067	1.27967	1.373	1.20733	1.22567	1.22667	1.313	1.204	1.313			210	0.215333	-0.00566667	0.0876667	-0.078	-0.0596667	-0.0586667	0.0276667	-0.0813333	0.0276667
240	1.28333	1.523	1.28733	1.38833	1.206	1.22567	1.22433	1.324	1.203	1.322			240	0.239667	0.004	0.105	-0.0773333	-0.0576667	-0.059	0.0406667	-0.0803333	0.0386667
270	1.28	1.547	1.29067	1.39667	1.20733	1.22567	1.22567	1.3365	1.205	1.326			270	0.267	0.0106667	0.116667	-0.0726667	-0.0543333	-0.0543333	0.0565	-0.075	0.046
300	1.279	1.561	1.291	1.40167	1.22	1.219	1.222	1.349	1.211	1.336			300	0.282	0.012	0.122667	-0.059	-0.06	-0.057	0.07	-0.068	0.057
330	1.28067	1.59067	1.306	1.418	1.20333	1.22967	1.22433	1.3575	1.2065	1.35			330	0.31	0.0253333	0.137333	-0.0773333	-0.051	-0.0563333	0.0768333	-0.0741667	0.0693333
360	1.27433	1.60233	1.30367	1.42767	1.20367	1.22333	1.22433	1.368	1.2035	1.353			360	0.328	0.0293333	0.153333	-0.0706667	-0.051	-0.05	0.0936667	-0.0708333	0.0786667
390	1.28167	1.63567	1.31567	1.446	1.21267	1.229	1.22167	1.3715	1.1825	1.348			390	0.354	0.034	0.164333	-0.069	-0.0526667	-0.06	0.0898333	-0.0991667	0.0663333
420	1.27367	1.65	1.315	1.44533	1.20667	1.225	1.21733	1.3885	1.196	1.368			420	0.376333	0.0413333	0.171667	-0.067	-0.0486667	-0.0563333	0.114833	-0.0776667	0.0943333
450	1.272	1.673	1.31567	1.46467	1.205	1.23	1.21733	1.3995	1.1925	1.376			450	0.401	0.0436667	0.192667	-0.067	-0.042	-0.0546667	0.1275	-0.0795	0.104
480	1.27467	1.69267	1.32533	1.473	1.20233	1.23033	1.22133	1.4115	1.192	1.389			480	0.418	0.0506667	0.198333	-0.0723333	-0.0443333	-0.0533333	0.136833	-0.0826667	0.114333
510	1.26967	1.71167	1.33333	1.485	1.20233	1.23	1.21867	1.421	1.1885	1.394			510	0.442	0.0636667	0.215333	-0.0673333	-0.0396667	-0.051	0.151333	-0.0811667	0.124333
540	1.271	1.727	1.336	1.501	1.20167	1.232	1.22033	1.433	1.192	1.409			540	0.456	0.065	0.23	-0.0693333	-0.039	-0.0506667	0.162	-0.079	0.138
570	1.27133	1.74567	1.34067	1.51233	1.20267	1.224	1.218	1.4375	1.1835	1.409			570	0.474333	0.0693333	0.241	-0.0686667	-0.0473333	-0.0533333	0.166167	-0.0878333	0.137667
600	1.26467	1.75833	1.34833	1.52067	1.201	1.224	1.21367	1.4545	1.187	1.428			600	0.493667	0.0836667	0.256	-0.0636667	-0.0406667	-0.051	0.189833	-0.0776667	0.163333
630	1.266	1.77233	1.36233	1.53533	1.19933	1.22467	1.21567	1.4585	1.184	1.43			630	0.506333	0.0963333	0.269333	-0.0666667	-0.0413333	-0.0503333	0.1925	-0.082	0.164
660	1.26133	1.78833	1.368	1.54533	1.19867	1.22467	1.215	1.4695	1.192	1.446			660	0.527	0.106667	0.284	-0.0626667	-0.0366667	-0.0463333	0.208167	-0.0693333	0.184667
690	1.265	1.80367	1.39033	1.56033	1.20067	1.229	1.21733	1.484	1.1855	1.461			690	0.538667	0.125333	0.295333	-0.0643333	-0.036	-0.0476667	0.219	-0.0795	0.196
720	1.26433	1.812	1.396	1.567	1.19567	1.22267	1.21667	1.4925	1.191	1.465			720	0.547667	0.131667	0.302667	-0.0686667	-0.0416667	-0.0476667	0.228167	-0.0733333	0.200667
750	1.26333	1.82367	1.386	1.58367	1.197	1.214	1.22267	1.5005	1.186	1.474			750	0.560333	0.122667	0.320333	-0.0663333	-0.0493333	-0.0406667	0.237167	-0.0773333	0.210667
780	1.25733	1.83067	1.38733	1.59667	1.19633	1.20567	1.21767	1.507	1.1805	1.48			780	0.573333	0.13	0.339333	-0.061	-0.0516667	-0.0396667	0.249667	-0.0768333	0.222667
810	1.26067	1.84167	1.40567	1.61833	1.20133	1.20567	1.223	1.5185	1.1815	1.491			810	0.581	0.145	0.357667	-0.0593333	-0.055	-0.0376667	0.257833	-0.0791667	0.230333
840	1.25433	1.848	1.404	1.62767	1.19767	1.203	1.22367	1.525	1.1775	1.5			840	0.593667	0.149667	0.373333	-0.0566667	-0.0513333	-0.0306667	0.270667	-0.0768333	0.245667
870	1.25033	1.849	1.411	1.63767	1.196	1.19633	1.218	1.5355	1.175	1.509			870	0.598667	0.160667	0.387333	-0.0543333	-0.054	-0.0323333	0.285167	-0.0753333	0.258667
900	1.25367	1.855	1.41933	1.65167	1.19367	1.19967	1.217	1.5455	1.173	1.52			900	0.601333	0.165667	0.398	-0.06	-0.054	-0.0366667	0.291833	-0.0806667	0.266333
930	1.25	1.864	1.43067	1.66333	1.20967	1.19867	1.21633	1.554	1.1805	1.529			930	0.614	0.180667	0.413333	-0.0403333	-0.0513333	-0.0336667	0.304	-0.0695	0.279
960	1.25133	1.86433	1.429	1.68467	1.213	1.202	1.215	1.568	1.1765	1.54			960	0.613	0.177667	0.433333	-0.0383333	-0.0493333	-0.0363333	0.316667	-0.0748333	0.288667
990	1.249	1.86567	1.44667	1.694	1.20133	1.19933	1.21567	1.5755	1.1815	1.548			990	0.616667	0.197667	0.445	-0.0476667	-0.0496667	-0.0333333	0.3265	-0.0675	0.299
1020	1.24933	1.86933	1.45267	1.697	1.20633	1.19733	1.21067	1.5795	1.171	1.554			1020	0.62	0.203333	0.447667	-0.043	-0.052	-0.0386667	0.330167	-0.0783333	0.304667
1050	1.25	1.88767	1.46233	1.71	1.23333	1.20167	1.21167	1.5995	1.176	1.566			1050	0.637667	0.212333	0.46	-0.0166667	-0.0483333	-0.0383333	0.3495	-0.074	0.316
1080	1.248	1.882	1.459	1.71767	1.23	1.19767	1.213	1.603	1.1795	1.582			1080	0.634	0.211	0.469667	-0.018	-0.0503333	-0.035	0.355	-0.0685	0.334
1110	1.24833	1.87533	1.46133	1.72833	1.21067	1.19733	1.21033	1.6115	1.1815	1.585			1110	0.627	0.213	0.48	-0.0376667	-0.051	-0.038	0.363167	-0.0668333	0.336667
1140	1.24533	1.881	1.47933	1.73533	1.205	1.19533	1.21133	1.626	1.181	1.593			1140	0.635667	0.234	0.49	-0.0403333	-0.05	-0.034	0.380667	-0.0643333	0.347667
1170	1.24233	1.878	1.49533	1.74333	1.20433	1.18967	1.20667	1.6395	1.1795	1.61			1170	0.635667	0.253	0.501	-0.038	-0.0526667	-0.0356667	0.397167	-0.0628333	0.367667
1200	1.24567	1.884	1.52967	1.75333	1.19133	1.193	1.21067	1.6455	1.1725	1.623			1200	0.638333	0.284	0.507667	-0.0543333	-0.0526667	-0.035	0.399833	-0.0731667	0.377333
1230	1.247	1.903	1.55033	1.76567	1.19	1.2	1.215	1.6575	1.1785	1.703			1230	0.656	0.303333	0.518667	-0.057	-0.047	-0.032	0.4105	-0.0685	0.456
1260	1.24533	1.89833	1.52633	1.77133	1.18767	1.19367	1.212	1.654	1.177	1.706			1260	0.653	0.281	0.526	-0.0576667	-0.0516667	-0.0333333	0.408667	-0.0683333	0.460667
1290	1.247	1.89833	1.534	1.77667	1.18533	1.201	1.21233	1.6585	1.179	1.699			1290	0.651333	0.287	0.529667	-0.0616667	-0.046	-0.0346667	0.4115	-0.068	0.452
1320	1.244	1.90833	1.55067	1.77633	1.18567	1.2	1.21867	1.661	1.1715	1.653			1320	0.664333	0.306667	0.532333	-0.0583333	-0.044	-0.0253333	0.417	-0.0725	0.409
1350	1.24833	1.90967	1.568	1.78467	1.19	1.208	1.228	1.67	1.184	1.657			1350	0.661333	0.319667	0.536333	-0.0583333	-0.0403333	-0.0203333	0.421667	-0.0643333	0.408667
1380	1.249	1.91333	1.56633	1.792	1.193	1.21033	1.229	1.678	1.18	1.672			1380	0.664333	0.317333	0.543	-0.056	-0.0386667	-0.02	0.429	-0.069	0.423
1410	1.243	1.90367	1.546	1.79533	1.192	1.20133	1.22267	1.679	1.182	1.676			1410	0.660667	0.303	0.552333	-0.051	-0.0416667	-0.0203333	0.436	-0.061	0.433
1440	1.24433	1.91967	1.55967	1.80667	1.19267	1.203	1.222	1.686	1.187	1.679			1440	0.675333	0.315333	0.562333	-0.0516667	-0.0413333	-0.0223333	0.441667	-0.0573333	0.434667
1470	1.243	1.916	1.57433	1.816	1.19433	1.20767	1.223	1.699	1.1925	1.693			1470	0.673	0.331333	0.573	-0.0486667	-0.0353333	-0.02	0.456	-0.0505	0.45
1500	1.24067	1.91	1.591	1.81833	1.19133	1.20067	1.22133	1.6965	1.193	1.697			1500	0.669333	0.350333	0.577667	-0.0493333	-0.04	-0.0193333	0.455833	-0.0476667	0.456333
1530	1.24133	1.93133	1.593	1.835	1.19233	1.21133	1.226	1.708	1.1945	1.698			1530	0.69	0.351667	0.593667	-0.049	-0.03	-0.0153333	0.466667	-0.0468333	0.456667
1560	1.24533	1.92667	1.598	1.83367	1.19733	1.20133	1.23267	1.714	1.2115	1.711			1560	0.681333	0.352667	0.588333	-0.048	-0.044	-0.0126667	0.468667	-0.0338333	0.465667
1590	1.24133	1.89867	1.608	1.84533	1.195	1.19567	1.224	1.7125	1.209	1.712			1590	0.657333	0.366667	0.604	-0.0463333	-0.0456667	-0.0173333	0.471167	-0.0323333	0.470667
1620	1.24467	1.897	1.62	1.852	1.207	1.205	1.231	1.7315	1.208	1.725			1620	0.652333	0.375333	0.607333	-0.0376667	-0.0396667	-0.0136667	0.486833	-0.0366667	0.480333
1650	1.24233	1.88467	1.62	1.86567	1.20667	1.199	1.22567	1.733	1.1965	1.722			1650	0.642333	0.377667	0.623333	-0.0356667	-0.0433333	-0.0166667	0.490667	-0.0458333	0.479667
1680	1.24167	1.88267	1.61767	1.87467	1.20967	1.195	1.22133	1.7295	1.1945	1.733			1680	0.641	0.376	0.633	-0.032	-0.0466667	-0.0203333	0.487833	-0.0471667	0.491333
1710	1.24033	1.88367	1.62333	1.87267	1.208	1.2	1.22133	1.7365	1.1945	1.749			1710	0.643333	0.383	0.632333	-0.0323333	-0.0403333	-0.019	0.496167	-0.0458333	0.508667
1740	1.24333	1.882	1.62767	1.86333	1.20167	1.19733	1.22	1.7365	1.1895	1.75			1740	0.638667	0.384333	0.62	-0.0416667	-0.046	-0.0233333	0.493167	-0.0538333	0.506667
1770	1.24	1.87833	1.62333	1.84467	1.19533	1.18967	1.21967	1.7395	1.1805	1.752			1770	0.638333	0.383333	0.604667	-0.0446667	-0.0503333	-0.0203333	0.4995	-0.0595	0.512
1800	1.23567	1.88333	1.62767	1.83533	1.18667	1.18633	1.214	1.734	1.1745	1.748			1800	0.647667	0.392	0.599667	-0.049	-0.0493333	-0.0216667	0.498333	-0.0611667	0.512333
1830	1.24067	1.87467	1.63167	1.83867	1.19167	1.19233	1.21867	1.738	1.1735	1.765			1830	0.634	0.391	0.598	-0.049	-0.0483333	-0.022	0.497333	-0.0671667	0.524333
1860	1.23833	1.86867	1.638	1.83067	1.18967	1.19067	1.219	1.7395	1.1715	1.765			1860	0.630333	0.399667	0.592333	-0.0486667	-0.0476667	-0.0193333	0.501167	-0.0668333	0.526667
1890	1.236	1.86133	1.63933	1.828	1.188	1.18967	1.21667	1.7445	1.167	1.761			1890	0.625333	0.403333	0.592	-0.048	-0.0463333	-0.0193333	0.5085	-0.069	0.525
1920	1.23767	1.85867	1.649	1.83233	1.18733	1.19467	1.22067	1.7515	1.1685	1.772			1920	0.621	0.411333	0.594667	-0.0503333	-0.043	-0.017	0.513833	-0.0691667	0.534333
1950	1.23667	1.85867	1.65367	1.82633	1.18667	1.19033	1.22033	1.753	1.1675	1.77			1950	0.622	0.417	0.589667	-0.05	-0.0463333	-0.0163333	0.516333	-0.0691667	0.533333
1980	1.23967	1.859	1.66233	1.834	1.19067	1.19333	1.22033	1.7575	1.1665	1.775			1980	0.619333	0.422667	0.594333	-0.049	-0.0463333	-0.0193333	0.517833	-0.0731667	0.535333
2010	1.237	1.853	1.66567	1.83	1.18767	1.18967	1.219	1.7585	1.1625	1.774			2010	0.616	0.428667	0.593	-0.0493333	-0.0473333	-0.018	0.5215	-0.0745	0.537
2040	1.23567	1.856	1.674	1.83033	1.19	1.192	1.222	1.768	1.1625	1.782			2040	0.620333	0.438333	0.594667	-0.0456667	-0.0436667	-0.0136667	0.532333	-0.0731667	0.546333
2070	1.239	1.85767	1.68033	1.83267	1.19133	1.19333	1.22467	1.7715	1.1625	1.787			2070	0.618667	0.441333	0.593667	-0.0476667	-0.0456667	-0.0143333	0.5325	-0.0765	0.548
2100	1.23867	1.86	1.68667	1.83133	1.19233	1.193	1.22533	1.769	1.166	1.785			2100	0.621333	0.448	0.592667	-0.0463333	-0.0456667	-0.0133333	0.530333	-0.0726667	0.546333
2130	1.24	1.85933	1.69233	1.83267	1.194	1.194	1.225	1.7715	1.166	1.802			2130	0.619333	0.452333	0.592667	-0.046	-0.046	-0.015	0.5315	-0.074	0.562
2160	1.23767	1.85733	1.697	1.83167	1.19267	1.19567	1.22233	1.7695	1.168	1.789			2160	0.619667	0.459333	0.594	-0.045	-0.042	-0.0153333	0.531833	-0.0696667	0.551333
2190	1.23667	1.85533	1.69933	1.82867	1.18933	1.19067	1.22467	1.769	1.164	1.784			2190	0.618667	0.462667	0.592	-0.0473333	-0.046	-0.012	0.532333	-0.0726667	0.547333
2220	1.23567	1.85167	1.708	1.82733	1.19367	1.192	1.22733	1.7735	1.1675	1.786			2220	0.616	0.472333	0.591667	-0.042	-0.0436667	-0.00833333	0.537833	-0.0681667	0.550333
2250	1.23833	1.85733	1.71333	1.832	1.19367	1.19933	1.22933	1.7795	1.1715	1.791			2250	0.619	0.475	0.593667	-0.0446667	-0.039	-0.009	0.541167	-0.0668333	0.552667
2280	1.239	1.85633	1.722	1.83167	1.194	1.19567	1.233	1.778	1.1725	1.796			2280	0.617333	0.483	0.592667	-0.045	-0.0433333	-0.006	0.539	-0.0665	0.557
2310	1.236	1.85833	1.72567	1.83367	1.19133	1.194	1.22967	1.775	1.174	1.794			2310	0.622333	0.489667	0.597667	-0.0446667	-0.042	-0.00633333	0.539	-0.062	0.558
2340	1.23433	1.849	1.72833	1.83133	1.19067	1.19267	1.23067	1.7725	1.178	1.793			2340	0.614667	0.494	0.597	-0.0436667	-0.0416667	-0.00366667	0.538167	-0.0563333	0.558667
2370	1.239	1.85633	1.735	1.82833	1.19167	1.19567	1.231	1.773	1.179	1.797			2370	0.617333	0.496	0.589333	-0.0473333	-0.0433333	-0.008	0.534	-0.06	0.558
2400	1.23567	1.85633	1.73667	1.831	1.19433	1.19333	1.23367	1.7705	1.18	1.8			2400	0.620667	0.501	0.595333	-0.0413333	-0.0423333	-0.002	0.534833	-0.0556667	0.564333
2430	1.23967	1.85467	1.744	1.832	1.19533	1.199	1.233	1.7735	1.176	1.804			2430	0.615	0.504333	0.592333	-0.0443333	-0.0406667	-0.00666667	0.533833	-0.0636667	0.564333
2460	1.232	1.84767	1.74533	1.82367	1.18833	1.18967	1.22633	1.7645	1.1715	1.793			2460	0.615667	0.513333	0.591667	-0.0436667	-0.0423333	-0.00566667	0.5325	-0.0605	0.561
2490	1.23433	1.852	1.756	1.83067	1.195	1.19633	1.23233	1.7695	1.178	1.798			2490	0.617667	0.521667	0.596333	-0.0393333	-0.038	-0.002	0.535167	-0.0563333	0.563667
2520	1.23433	1.85	1.75533	1.82867	1.19833	1.19667	1.23467	1.77	1.1755	1.799			2520	0.615667	0.521	0.594333	-0.036	-0.0376667	0.000333333	0.535667	-0.0588333	0.564667
2550	1.23833	1.85833	1.76433	1.833	1.201	1.19967	1.241	1.7745	1.1815	1.809			2550	0.62	0.526	0.594667	-0.0373333	-0.0386667	0.00266667	0.536167	-0.0568333	0.570667
2580	1.23733	1.85367	1.76433	1.82967	1.19667	1.197	1.23967	1.7705	1.1745	1.804			2580	0.616333	0.527	0.592333	-0.0406667	-0.0403333	0.00233333	0.533167	-0.0628333	0.566667
2610	1.232	1.84967	1.762	1.82833	1.19633	1.19467	1.23833	1.765	1.175	1.802			2610	0.617667	0.53	0.596333	-0.0356667	-0.0373333	0.00633333	0.533	-0.057	0.57
2640	1.23467	1.85367	1.766	1.83067	1.19767	1.19833	1.24367	1.7665	1.174	1.808			2640	0.619	0.531333	0.596	-0.037	-0.0363333	0.009	0.531833	-0.0606667	0.573333
2670	1.237	1.85567	1.77267	1.83	1.19933	1.19867	1.24267	1.771	1.174	1.807			2670	0.618667	0.535667	0.593	-0.0376667	-0.0383333	0.00566667	0.534	-0.063	0.57
2700	1.232	1.84833	1.76833	1.82667	1.195	1.194	1.239	1.7685	1.1745	1.803			2700	0.616333	0.536333	0.594667	-0.037	-0.038	0.007	0.5365	-0.0575	0.571
2730	1.23367	1.85267	1.77533	1.82867	1.199	1.199	1.244	1.772	1.1735	1.807			2730	0.619	0.541667	0.595	-0.0346667	-0.0346667	0.0103333	0.538333	-0.0601667	0.573333
2760	1.232	1.85267	1.77367	1.82933	1.19867	1.19767	1.24133	1.772	1.1745	1.807			2760	0.620667	0.541667	0.597333	-0.0333333	-0.0343333	0.00933333	0.54	-0.0575	0.575
2790	1.23533	1.85367	1.781	1.831	1.201	1.19833	1.24833	1.775	1.178	1.81			2790	0.618333	0.545667	0.595667	-0.0343333	-0.037	0.013	0.539667	-0.0573333	0.574667
2820	1.23	1.85067	1.776	1.825	1.19967	1.19267	1.244	1.768	1.1705	1.803			2820	0.620667	0.546	0.595	-0.0303333	-0.0373333	0.014	0.538	-0.0595	0.573
2850	1.23133	1.85433	1.78133	1.826	1.20167	1.19967	1.245	1.768	1.1725	1.809			2850	0.623	0.55	0.594667	-0.0296667	-0.0316667	0.0136667	0.536667	-0.0588333	0.577667
2880	1.23167	1.85667	1.782	1.831	1.20167	1.19933	1.24933	1.7765	1.176	1.813			2880	0.625	0.550333	0.599333	-0.03	-0.0323333	0.0176667	0.544833	-0.0556667	0.581333
2910	1.228	1.85167	1.78333	1.82667	1.20133	1.19933	1.247	1.7715	1.1755	1.803			2910	0.623667	0.555333	0.598667	-0.0266667	-0.0286667	0.019	0.5435	-0.0525	0.575
2940	1.23167	1.854	1.78533	1.82833	1.20333	1.19933	1.24567	1.7705	1.176	1.803			2940	0.622333	0.553667	0.596667	-0.0283333	-0.0323333	0.014	0.538833	-0.0556667	0.571333
2970	1.22767	1.85133	1.78567	1.824	1.19867	1.19633	1.24833	1.7675	1.174	1.803			2970	0.623667	0.558	0.596333	-0.029	-0.0313333	0.0206667	0.539833	-0.0536667	0.575333
3000	1.227	1.85533	1.787	1.82733	1.19867	1.19833	1.248	1.766	1.176	1.806			3000	0.628333	0.56	0.600333	-0.0283333	-0.0286667	0.021	0.539	-0.051	0.579
3030	1.23033	1.85567	1.793	1.82633	1.20333	1.20033	1.252	1.772	1.178	1.803			3030	0.625333	0.562667	0.596	-0.027	-0.03	0.0216667	0.541667	-0.0523333	0.572667
3060	1.227	1.85933	1.79033	1.82567	1.20233	1.19767	1.25	1.7655	1.1775	1.802			3060	0.632333	0.563333	0.598667	-0.0246667	-0.0293333	0.023	0.5385	-0.0495	0.575
3090	1.229	1.86167	1.79167	1.82667	1.20533	1.202	1.251	1.767	1.179	1.805			3090	0.632667	0.562667	0.597667	-0.0236667	-0.027	0.022	0.538	-0.05	0.576
3120	1.22733	1.854	1.79367	1.82367	1.20533	1.2	1.25167	1.766	1.181	1.808			3120	0.626667	0.566333	0.596333	-0.022	-0.0273333	0.0243333	0.538667	-0.0463333	0.580667
3150	1.22833	1.853	1.79767	1.82533	1.20767	1.2	1.25067	1.7655	1.18	1.809			3150	0.624667	0.569333	0.597	-0.0206667	-0.0283333	0.0223333	0.537167	-0.0483333	0.580667
3180	1.22633	1.85333	1.79567	1.82533	1.20367	1.2	1.25367	1.761	1.182	1.809			3180	0.627	0.569333	0.599	-0.0226667	-0.0263333	0.0273333	0.534667	-0.0443333	0.582667
3210	1.23033	1.85533	1.79633	1.82667	1.20933	1.19967	1.253	1.763	1.1845	1.814			3210	0.625	0.566	0.596333	-0.021	-0.0306667	0.0226667	0.532667	-0.0458333	0.583667
3240	1.22867	1.86433	1.797	1.82567	1.21	1.203	1.26	1.7655	1.1835	1.81			3240	0.635667	0.568333	0.597	-0.0186667	-0.0256667	0.0313333	0.536833	-0.0451667	0.581333
3270	1.22367	1.85233	1.79567	1.82033	1.20233	1.2	1.25433	1.7605	1.1815	1.808			3270	0.628667	0.572	0.596667	-0.0213333	-0.0236667	0.0306667	0.536833	-0.0421667	0.584333
3300	1.23	1.86233	1.80333	1.82667	1.213	1.205	1.26033	1.7675	1.186	1.805			3300	0.632333	0.573333	0.596667	-0.017	-0.025	0.0303333	0.5375	-0.044	0.575
3330	1.22733	1.85367	1.798	1.823	1.20767	1.202	1.26	1.7615	1.1865	1.804			3330	0.626333	0.570667	0.595667	-0.0196667	-0.0253333	0.0326667	0.534167	-0.0408333	0.576667
3360	1.227	1.85633	1.80467	1.82633	1.21033	1.206	1.261	1.767	1.1885	1.805			3360	0.629333	0.577667	0.599333	-0.0166667	-0.021	0.034	0.54	-0.0385	0.578
3390	1.22733	1.859	1.803	1.824	1.21	1.207	1.26333	1.7635	1.1925	1.804			3390	0.631667	0.575667	0.596667	-0.0173333	-0.0203333	0.036	0.536167	-0.0348333	0.576667
3420	1.23	1.85967	1.80367	1.83	1.21367	1.208	1.26	1.7635	1.1895	1.803			3420	0.629667	0.573667	0.6	-0.0163333	-0.022	0.03	0.5335	-0.0405	0.573
3450	1.22833	1.86033	1.80033	1.823	1.21033	1.20633	1.26267	1.763	1.1885	1.804			3450	0.632	0.572	0.594667	-0.018	-0.022	0.0343333	0.534667	-0.0398333	0.575667
3480	1.22833	1.859	1.803	1.825	1.21167	1.20833	1.26567	1.765	1.193	1.81			3480	0.630667	0.574667	0.596667	-0.0166667	-0.02	0.0373333	0.536667	-0.0353333	0.581667
3510	1.22433	1.85433	1.79567	1.81733	1.206	1.203	1.262	1.759	1.188	1.807			3510	0.63	0.571333	0.593	-0.0183333	-0.0213333	0.0376667	0.534667	-0.0363333	0.582667
3540	1.22633	1.855	1.79933	1.82633	1.21	1.20633	1.26233	1.763	1.189	1.803			3540	0.628667	0.573	0.6	-0.0163333	-0.02	0.036	0.536667	-0.0373333	0.576667
3570	1.22533	1.85667	1.80133	1.82433	1.212	1.204	1.263	1.7615	1.192	1.807			3570	0.631333	0.576	0.599	-0.0133333	-0.0213333	0.0376667	0.536167	-0.0333333	0.581667
3600	1.23	1.85467	1.803	1.827	1.21433	1.20767	1.267	1.7665	1.1935	1.809			3600	0.624667	0.573	0.597	-0.0156667	-0.0223333	0.037	0.5365	-0.0365	0.579
3630	1.22533	1.851	1.799	1.82033	1.211	1.207	1.264	1.7605	1.1905	1.808			3630	0.625667	0.573667	0.595	-0.0143333	-0.0183333	0.0386667	0.535167	-0.0348333	0.582667
3660	1.226	1.854	1.79767	1.822	1.21067	1.20333	1.26533	1.7595	1.191	1.804			3660	0.628	0.571667	0.596	-0.0153333	-0.0226667	0.0393333	0.5335	-0.035	0.578
3690	1.22467	1.852	1.79967	1.822	1.21233	1.205	1.267	1.7665	1.19	1.805			3690	0.627333	0.575	0.597333	-0.0123333	-0.0196667	0.0423333	0.541833	-0.0346667	0.580333
3720	1.222	1.851	1.79533	1.818	1.20967	1.2	1.26567	1.761	1.1865	1.802			3720	0.629	0.573333	0.596	-0.0123333	-0.022	0.0436667	0.539	-0.0355	0.58
3750	1.22367	1.85267	1.79933	1.82167	1.21733	1.20667	1.27167	1.764	1.1895	1.806			3750	0.629	0.575667	0.598	-0.00633333	-0.017	0.048	0.540333	-0.0341667	0.582333
3780	1.22433	1.85133	1.79767	1.81867	1.21933	1.20533	1.27	1.759	1.192	1.802			3780	0.627	0.573333	0.594333	-0.005	-0.019	0.0456667	0.534667	-0.0323333	0.577667
3810	1.227	1.85333	1.8	1.82233	1.22433	1.20767	1.27567	1.766	1.193	1.807			3810	0.626333	0.573	0.595333	-0.00266667	-0.0193333	0.0486667	0.539	-0.034	0.58
3840	1.224	1.85133	1.79867	1.82233	1.217	1.20633	1.27367	1.7615	1.194	1.805			3840	0.627333	0.574667	0.598333	-0.007	-0.0176667	0.0496667	0.5375	-0.03	0.581
3870	1.225	1.85133	1.79967	1.82433	1.21633	1.20533	1.274	1.765	1.1975	1.807			3870	0.626333	0.574667	0.599333	-0.00866667	-0.0196667	0.049	0.54	-0.0275	0.582
3900	1.21633	1.847	1.79233	1.81767	1.21367	1.199	1.269	1.758	1.1905	1.799			3900	0.630667	0.576	0.601333	-0.00266667	-0.0173333	0.0526667	0.541667	-0.0258333	0.582667
3930	1.218	1.84867	1.799	1.81967	1.21567	1.20167	1.272	1.758	1.1905	1.802			3930	0.630667	0.581	0.601667	-0.00233333	-0.0163333	0.054	0.54	-0.0275	0.584
3960	1.223	1.856	1.80167	1.82033	1.22	1.20633	1.27733	1.761	1.1965	1.806			3960	0.633	0.578667	0.597333	-0.003	-0.0166667	0.0543333	0.538	-0.0265	0.583
3990	1.22567	1.857	1.80467	1.82233	1.224	1.207	1.28067	1.7645	1.197	1.81			3990	0.631333	0.579	0.596667	-0.00166667	-0.0186667	0.055	0.538833	-0.0286667	0.584333
4020	1.22033	1.85467	1.799	1.82	1.21867	1.205	1.277	1.7585	1.1945	1.803			4020	0.634333	0.578667	0.599667	-0.00166667	-0.0153333	0.0566667	0.538167	-0.0258333	0.582667
4050	1.22233	1.855	1.798	1.823	1.21933	1.20767	1.27933	1.763	1.195	1.803			4050	0.632667	0.575667	0.600667	-0.003	-0.0146667	0.057	0.540667	-0.0273333	0.580667
4080	1.22067	1.85433	1.79767	1.81733	1.218	1.20467	1.279	1.756	1.1945	1.803			4080	0.633667	0.577	0.596667	-0.00266667	-0.016	0.0583333	0.535333	-0.0261667	0.582333
4110	1.219	1.85467	1.79667	1.819	1.22233	1.20433	1.27967	1.757	1.194	1.804			4110	0.635667	0.577667	0.6	0.00333333	-0.0146667	0.0606667	0.538	-0.025	0.585
4140	1.21833	1.85933	1.79867	1.815	1.21967	1.20567	1.279	1.7565	1.196	1.804			4140	0.641	0.580333	0.596667	0.00133333	-0.0126667	0.0606667	0.538167	-0.0223333	0.585667
4170	1.22233	1.858	1.79733	1.82233	1.221	1.208	1.28033	1.758	1.199	1.806			4170	0.635667	0.575	0.6	-0.00133333	-0.0143333	0.058	0.535667	-0.0233333	0.583667
4200	1.22233	1.853	1.79933	1.81767	1.222	1.20767	1.285	1.7605	1.1965	1.806			4200	0.630667	0.577	0.595333	-0.000333333	-0.0146667	0.0626667	0.538167	-0.0258333	0.583667
4230	1.222	1.853	1.79533	1.81667	1.22033	1.20667	1.28167	1.7605	1.1985	1.803			4230	0.631	0.573333	0.594667	-0.00166667	-0.0153333	0.0596667	0.5385	-0.0235	0.581
4260	1.22	1.855	1.796	1.81767	1.22433	1.20633	1.28167	1.7575	1.2005	1.805			4260	0.635	0.576	0.597667	0.00433333	-0.0136667	0.0616667	0.5375	-0.0195	0.585
4290	1.22633	1.867	1.801	1.825	1.22733	1.21233	1.28967	1.766	1.206	1.808			4290	0.640667	0.574667	0.598667	0.001	-0.014	0.0633333	0.539667	-0.0203333	0.581667
4320	1.22	1.856	1.796	1.82	1.22333	1.20567	1.285	1.758	1.202	1.806			4320	0.636	0.576	0.6	0.00333333	-0.0143333	0.065	0.538	-0.018	0.586
4350	1.21733	1.85367	1.79633	1.815	1.223	1.20733	1.28467	1.7555	1.202	1.801			4350	0.636333	0.579	0.597667	0.00566667	-0.01	0.0673333	0.538167	-0.0153333	0.583667
4380	1.22067	1.84967	1.79733	1.817	1.222	1.20767	1.28633	1.757	1.2025	1.799			4380	0.629	0.576667	0.596333	0.00133333	-0.013	0.0656667	0.536333	-0.0181667	0.578333
4410	1.21833	1.84733	1.79367	1.81467	1.22	1.20667	1.285	1.756	1.2045	1.801			4410	0.629	0.575333	0.596333	0.00166667	-0.0116667	0.0666667	0.537667	-0.0138333	0.582667
4440	1.222	1.855	1.79633	1.818	1.225	1.209	1.29067	1.7605	1.208	1.803			4440	0.633	0.574333	0.596	0.003	-0.013	0.0686667	0.5385	-0.014	0.581
4470	1.21833	1.85433	1.795	1.818	1.226	1.209	1.28867	1.7595	1.2055	1.801			4470	0.636	0.576667	0.599667	0.00766667	-0.00933333	0.0703333	0.541167	-0.0128333	0.582667
4500	1.21867	1.84733	1.793	1.81433	1.22433	1.20767	1.28833	1.755	1.205	1.801			4500	0.628667	0.574333	0.595667	0.00566667	-0.011	0.0696667	0.536333	-0.0136667	0.582333
4530	1.216	1.84433	1.79267	1.81633	1.22433	1.20867	1.29033	1.7565	1.205	1.802			4530	0.628333	0.576667	0.600333	0.00833333	-0.00733333	0.0743333	0.5405	-0.011	0.586
4560	1.21833	1.85033	1.79533	1.81667	1.22567	1.21067	1.292	1.7575	1.2105	1.805			4560	0.632	0.577	0.598333	0.00733333	-0.00766667	0.0736667	0.539167	-0.00783333	0.586667
4590	1.21267	1.84533	1.79167	1.81033	1.221	1.20367	1.29033	1.752	1.2055	1.796			4590	0.632667	0.579	0.597667	0.00833333	-0.009	0.0776667	0.539333	-0.00716667	0.583333
4620	1.21333	1.84433	1.79133	1.81233	1.22333	1.205	1.29133	1.7535	1.2065	1.798			4620	0.631	0.578	0.599	0.01	-0.00833333	0.078	0.540167	-0.00683333	0.584667
4650	1.213	1.842	1.78867	1.812	1.225	1.20533	1.292	1.753	1.205	1.795			4650	0.629	0.575667	0.599	0.012	-0.00766667	0.079	0.54	-0.008	0.582
4680	1.21133	1.83967	1.789	1.80933	1.22433	1.20633	1.29133	1.7495	1.207	1.796			4680	0.628333	0.577667	0.598	0.013	-0.005	0.08	0.538167	-0.00433333	0.584667
4710	1.21633	1.84667	1.79233	1.81333	1.224	1.20667	1.293	1.7525	1.209	1.797			4710	0.630333	0.576	0.597	0.00766667	-0.00966667	0.0766667	0.536167	-0.00733333	0.580667
4740	1.217	1.84867	1.795	1.815	1.22967	1.211	1.29567	1.7545	1.2125	1.795			4740	0.631667	0.578	0.598	0.0126667	-0.006	0.0786667	0.5375	-0.0045	0.578
4770	1.21667	1.856	1.79467	1.81667	1.23033	1.212	1.299	1.7575	1.217	1.801			4770	0.639333	0.578	0.6	0.0136667	-0.00466667	0.0823333	0.540833	0.000333333	0.584333
4800	1.216	1.85267	1.79367	1.814	1.22767	1.20867	1.29933	1.7525	1.211	1.802			4800	0.636667	0.577667	0.598	0.0116667	-0.00733333	0.0833333	0.5365	-0.005	0.586
4830	1.217	1.85267	1.79533	1.81367	1.23267	1.212	1.301	1.754	1.2155	1.805			4830	0.635667	0.578333	0.596667	0.0156667	-0.005	0.084	0.537	-0.0015	0.588
4860	1.21467	1.85133	1.79567	1.81267	1.23067	1.21267	1.3	1.754	1.217	1.805			4860	0.636667	0.581	0.598	0.016	-0.002	0.0853333	0.539333	0.00233333	0.590333
4890	1.21633	1.85033	1.79367	1.81333	1.22867	1.20967	1.297	1.747	1.213	1.793			4890	0.634	0.577333	0.597	0.0123333	-0.00666667	0.0806667	0.530667	-0.00333333	0.576667
4920	1.21767	1.85	1.79233	1.814	1.23333	1.211	1.301	1.752	1.217	1.799			4920	0.632333	0.574667	0.596333	0.0156667	-0.00666667	0.0833333	0.534333	-0.000666667	0.581333
4950	1.21333	1.84567	1.791	1.81167	1.22967	1.21133	1.29933	1.7525	1.217	1.793			4950	0.632333	0.577667	0.598333	0.0163333	-0.002	0.086	0.539167	0.00366667	0.579667
4980	1.214	1.84633	1.79067	1.81133	1.22967	1.20933	1.301	1.753	1.219	1.8			4980	0.632333	0.576667	0.597333	0.0156667	-0.00466667	0.087	0.539	0.005	0.586
5010	1.21533	1.85033	1.79533	1.812	1.23133	1.21267	1.304	1.7515	1.2205	1.796			5010	0.635	0.58	0.596667	0.016	-0.00266667	0.0886667	0.536167	0.00516667	0.580667
5040	1.21533	1.847	1.79133	1.81067	1.228	1.209	1.30433	1.748	1.2165	1.795			5040	0.631667	0.576	0.595333	0.0126667	-0.00633333	0.089	0.532667	0.00116667	0.579667
5070	1.214	1.843	1.794	1.813	1.23	1.21233	1.305	1.75	1.2175	1.797			5070	0.629	0.58	0.599	0.016	-0.00166667	0.091	0.536	0.0035	0.583
5100	1.214	1.84867	1.79167	1.811	1.23233	1.21033	1.30367	1.7525	1.218	1.795			5100	0.634667	0.577667	0.597	0.0183333	-0.00366667	0.0896667	0.5385	0.004	0.581
5130	1.21367	1.84267	1.79333	1.81033	1.233	1.21233	1.306	1.752	1.218	1.798			5130	0.629	0.579667	0.596667	0.0193333	-0.00133333	0.0923333	0.538333	0.00433333	0.584333
5160	1.21667	1.85267	1.796	1.81567	1.23533	1.216	1.31	1.7555	1.2245	1.799			5160	0.636	0.579333	0.599	0.0186667	-0.000666667	0.0933333	0.538833	0.00783333	0.582333
5190	1.213	1.84367	1.79267	1.81367	1.23533	1.214	1.308	1.754	1.2235	1.799			5190	0.630667	0.579667	0.600667	0.0223333	0.001	0.095	0.541	0.0105	0.586
5220	1.21267	1.84267	1.794	1.811	1.24	1.21367	1.30933	1.749	1.2205	1.796			5220	0.63	0.581333	0.598333	0.0273333	0.001	0.0966667	0.536333	0.00783333	0.583333
5250	1.214	1.84433	1.796	1.81133	1.23467	1.21367	1.311	1.752	1.222	1.795			5250	0.630333	0.582	0.597333	0.0206667	-0.000333333	0.097	0.538	0.008	0.581
5280	1.21267	1.84967	1.792	1.81167	1.23567	1.21533	1.31067	1.7515	1.222	1.798			5280	0.637	0.579333	0.599	0.023	0.00266667	0.098	0.538833	0.00933333	0.585333
5310	1.211	1.847	1.79233	1.81	1.233	1.21233	1.309	1.7465	1.221	1.796			5310	0.636	0.581333	0.599	0.022	0.00133333	0.098	0.5355	0.01	0.585
5340	1.21633	1.84867	1.796	1.812	1.23767	1.21567	1.31533	1.7505	1.229	1.799			5340	0.632333	0.579667	0.595667	0.0213333	-0.000666667	0.099	0.534167	0.0126667	0.582667
5370	1.21333	1.85033	1.79333	1.81333	1.23733	1.218	1.31567	1.753	1.223	1.795			5370	0.637	0.58	0.6	0.024	0.00466667	0.102333	0.539667	0.00966667	0.581667
