# Supplementary material for: MukB ATPases are regulated independently by the N- and C-terminal domains of MukF kleisin
Source: eLife journal article supplement (doi:10.7554/elife.31522), 2018-01-11
Supplement: supp [file elife-31522-supp-v1.zip › elife_poa_e31522_Figure_5_figure_supplement_4_source_data_1.xlsx]

## Sheet: Sheet1
1000	57.7	1000	56.8	57.25	0.636396		0.488281	35.3717	500	15.4	17.6	37.9	23.6333	12.4042
500	55.5	500	52.8	54.15	1.90919		4.39262	38.6853	250	38.9	24.8	33.1	32.2667	7.08684
250	53.5	250	54.2	53.85	0.494975		8.29697	41.068	125	56.7	40.1	33.3	33.3667	12.0372
125	49.4	125	56	52.7	4.6669		12.2013	42.8636	62.5	48	26.5	30.9	35.1333	11.358
62.5	44.9	62.5	60.8	48.95	11.243		16.1057	44.2654	31.25	55.9	43.4	44.1	33	7.02353
31.25	42.3	31.25	52.6	47.45	7.2832		20.01	45.3901	15.625	28.2	32.7	31.6	30.8333	2.34592
15.625	44.7	15.625	45.8	45.25	0.777817		23.9143	46.3125	7.8125	31.8	28.7	31.9	30.8	1.81934
7.8125	36.9	7.8125	42.5	39.7	3.9598		27.8187	47.0827	3.90625	42.4	22.8	29.4	31.5333	9.97263
3.90625	37.8	3.90625	52.4	39.9	10.3238		31.723	47.7355	1.95312	42.2	29.2	35.1	35.5	6.50922
1.95312	35.8	1.95312	41.8	38.8	4.24264		35.6274	48.2957	0.976562	30.5	14.4	18.6	31.1667	8.35125
0.976562	33.1	0.976562	39.6	36.35	4.59619		39.5317	48.7819	0.488281	47.6	42.9	52.1	37.5333	4.60036
0.488281	27.9	0.488281	36.8	32.35	6.29325		43.4361	49.2078	0.244141	41.5	35.6	36	37.7	3.29697
