# Supplementary material for: MukB ATPases are regulated independently by the N- and C-terminal domains of MukF kleisin
Source: eLife journal article supplement (doi:10.7554/elife.31522), 2018-01-11
Supplement: supp [file elife-31522-supp-v1.zip › elife_poa_e31522_Figure_5_source_data_1.xlsx]

## Sheet: A
Time (seconds)	B:FN2	B:FN2m3	B:FN2m1	B:FN2m2
0	-0.016	-0.018	-0.02	-0.083
30	-0.005	-0.024	0.01	-0.066
60	-0.028	-0.051	0	-0.087
90	-0.035	-0.05	0.003	-0.086
120	-0.01	-0.025	0.026	-0.057
150	-0.02	-0.046	0.018	-0.058
180	-0.013	-0.045	0.025	-0.051
210	-0.008	-0.039	0.035	-0.041
240	0.002	-0.027	0.046	0.026
270	0.015	-0.013	0.059	0.039
300	0.022	0.003	0.069	0.044
330	0.03	0.017	0.074	0.046
360	0.026	0.014	0.067	0.037
390	0.033	0.021	0.079	0.044
420	0.041	0.023	0.077	0.046
450	0.047	0.031	0.085	0.047
480	0.05	0.023	0.083	0.047
510	0.055	0.024	0.081	0.051
540	0.06	0.028	0.08	0.057
570	0.068	0.033	0.084	0.06
600	0.07	0.035	0.083	0.058
630	0.077	0.037	0.085	0.061
660	0.08	0.04	0.084	0.057
690	0.087	0.046	0.09	0.061
720	0.086	0.044	0.091	0.058
750	0.097	0.049	0.092	0.058
780	0.094	0.051	0.093	0.059
810	0.102	0.054	0.102	0.063
840	0.101	0.049	0.097	0.059
870	0.107	0.052	0.099	0.059
900	0.122	0.057	0.105	0.062
930	0.121	0.061	0.112	0.063
960	0.124	0.069	0.118	0.068
990	0.131	0.067	0.121	0.064
1020	0.135	0.066	0.119	0.068
1050	0.139	0.07	0.124	0.066
1080	0.149	0.076	0.129	0.068
1110	0.15	0.074	0.129	0.061
1140	0.158	0.076	0.136	0.069
1170	0.163	0.079	0.136	0.066
1200	0.173	0.083	0.143	0.069
1230	0.181	0.085	0.146	0.071
1260	0.187	0.092	0.151	0.07
1290	0.197	0.096	0.153	0.072
1320	0.2	0.091	0.157	0.069
1350	0.214	0.1	0.164	0.073
1380	0.218	0.102	0.164	0.074
1410	0.228	0.107	0.171	0.077
1440	0.238	0.109	0.175	0.078
1470	0.242	0.111	0.179	0.072
1500	0.255	0.118	0.184	0.076
1530	0.257	0.112	0.183	0.073
1560	0.263	0.115	0.186	0.073
1590	0.276	0.12	0.197	0.077
1620	0.291	0.125	0.202	0.081
1650	0.296	0.123	0.2	0.078
1680	0.311	0.135	0.215	0.085
1710	0.313	0.131	0.214	0.081
1740	0.325	0.134	0.223	0.084
1770	0.332	0.137	0.226	0.086
1800	0.345	0.141	0.23	0.083
1830	0.352	0.147	0.237	0.087
1860	0.361	0.147	0.241	0.086
1890	0.378	0.153	0.245	0.093
1920	0.385	0.155	0.252	0.087
1950	0.394	0.16	0.257	0.088
1980	0.405	0.163	0.266	0.093
2010	0.416	0.163	0.266	0.092
2040	0.422	0.169	0.275	0.094
2070	0.434	0.171	0.28	0.094
2100	0.445	0.172	0.286	0.09
2130	0.46	0.182	0.291	0.096
2160	0.47	0.187	0.301	0.099
2190	0.476	0.184	0.301	0.096
2220	0.49	0.195	0.309	0.103
2250	0.504	0.195	0.311	0.1
2280	0.509	0.196	0.319	0.097
2310	0.52	0.2	0.327	0.099
2340	0.533	0.205	0.332	0.1
2370	0.542	0.208	0.332	0.101
2400	0.555	0.215	0.344	0.104
2430	0.567	0.218	0.351	0.106
2460	0.572	0.216	0.355	0.105
2490	0.586	0.222	0.359	0.104
2520	0.599	0.226	0.376	0.116
2550	0.61	0.235	0.377	0.109
2580	0.622	0.236	0.377	0.107
2610	0.63	0.239	0.381	0.108
2640	0.643	0.246	0.392	0.112
2670	0.649	0.245	0.398	0.113
2700	0.667	0.251	0.407	0.114
2730	0.673	0.256	0.413	0.111
2760	0.685	0.258	0.416	0.116
2790	0.695	0.264	0.421	0.118
2820	0.703	0.266	0.426	0.114
2850	0.717	0.271	0.432	0.12
2880	0.725	0.274	0.438	0.117
2910	0.737	0.278	0.445	0.116
2940	0.754	0.283	0.456	0.125
2970	0.764	0.287	0.46	0.12
3000	0.777	0.296	0.47	0.126
3030	0.786	0.297	0.477	0.129
3060	0.795	0.304	0.479	0.127
3090	0.802	0.306	0.481	0.126
3120	0.815	0.311	0.493	0.127
3150	0.828	0.314	0.499	0.131
3180	0.836	0.314	0.502	0.127
3210	0.844	0.322	0.506	0.129
3240	0.855	0.329	0.515	0.131
3270	0.869	0.334	0.524	0.137
3300	0.878	0.335	0.529	0.132
3330	0.887	0.342	0.535	0.132
3360	0.899	0.345	0.54	0.136
3390	0.905	0.35	0.545	0.135
3420	0.918	0.355	0.554	0.137
3450	0.922	0.359	0.56	0.135
3480	0.933	0.363	0.567	0.138
3510	0.944	0.371	0.569	0.136
3540	0.955	0.37	0.577	0.139
3570	0.96	0.375	0.582	0.14
3600	0.973	0.378	0.588	0.144
3630	0.984	0.386	0.598	0.145
3660	0.991	0.389	0.6	0.144
3690	0.997	0.394	0.608	0.142
3720	1.007	0.398	0.614	0.148
3750	1.015	0.404	0.615	0.145
3780	1.027	0.41	0.626	0.147
3810	1.031	0.409	0.631	0.145
3840	1.041	0.419	0.637	0.151
3870	1.053	0.42	0.647	0.148
3900	1.054	0.423	0.651	0.148
3930	1.064	0.428	0.655	0.152
3960	1.071	0.434	0.663	0.152
3990	1.075	0.437	0.665	0.151
4020	1.091	0.444	0.678	0.161
4050	1.094	0.454	0.681	0.156
4080	1.101	0.451	0.687	0.16
4110	1.104	0.458	0.696	0.167
4140	1.114	0.466	0.697	0.164
4170	1.12	0.464	0.701	0.163
4200	1.126	0.47	0.708	0.164
4230	1.127	0.476	0.711	0.161
4260	1.136	0.485	0.721	0.166
4290	1.142	0.49	0.729	0.17
4320	1.151	0.495	0.731	0.17
4350	1.155	0.499	0.736	0.17
4380	1.158	0.503	0.746	0.171
4410	1.159	0.506	0.747	0.17
4440	1.17	0.515	0.756	0.173
4470	1.169	0.515	0.765	0.172
4500	1.173	0.52	0.767	0.169
4530	1.187	0.528	0.78	0.175
4560	1.182	0.53	0.781	0.171
4590	1.178	0.529	0.779	0.17
4620	1.189	0.539	0.792	0.174
4650	1.192	0.546	0.799	0.173
4680	1.194	0.544	0.8	0.174
4710	1.199	0.548	0.809	0.174
4740	1.2	0.558	0.815	0.176
4770	1.201	0.562	0.818	0.174
4800	1.203	0.565	0.826	0.179
4830	1.207	0.571	0.828	0.178
4860	1.211	0.576	0.835	0.178
4890	1.216	0.58	0.848	0.182
4920	1.219	0.584	0.845	0.181
4950	1.212	0.59	0.852	0.181
4980	1.211	0.589	0.854	0.177
5010	1.219	0.594	0.867	0.185
5040	1.22	0.596	0.871	0.181
5070	1.22	0.601	0.878	0.183
5100	1.224	0.608	0.884	0.186
5130	1.222	0.611	0.888	0.188
5160	1.224	0.62	0.897	0.19
5190	1.225	0.622	0.894	0.189
5220	1.226	0.628	0.904	0.189
5250	1.226	0.635	0.912	0.19
5280	1.226	0.637	0.913	0.188
5310	1.227	0.64	0.916	0.191
5340	1.226	0.641	0.921	0.188
5370	1.227	0.647	0.928	0.189

## Sheet: B
Time (seconds)	Bm1:F	Bm3:F
0	0.011	0.046
30	0.01	0.06
60	0.003	0.077
90	-0.006	0.092
120	-0.005	0.102
150	-0.012	0.117
180	-0.016	0.121
210	-0.018	0.134
240	-0.018	0.153
270	-0.02	0.165
300	-0.009	0.172
330	-0.007	0.185
360	-0.006	0.203
390	-0.002	0.218
420	0.001	0.226
450	0.005	0.238
480	0.008	0.252
510	0.012	0.264
540	0.017	0.272
570	0.017	0.288
600	0.017	0.296
630	0.023	0.312
660	0.029	0.328
690	0.022	0.342
720	0.027	0.355
750	0.034	0.365
780	0.03	0.374
810	0.034	0.392
840	0.035	0.4
870	0.041	0.415
900	0.039	0.424
930	0.046	0.432
960	0.045	0.445
990	0.046	0.46
1020	0.052	0.471
1050	0.049	0.48
1080	0.054	0.493
1110	0.05	0.5
1140	0.054	0.508
1170	0.057	0.515
1200	0.058	0.526
1230	0.063	0.542
1260	0.062	0.55
1290	0.062	0.559
1320	0.063	0.568
1350	0.066	0.574
1380	0.068	0.586
1410	0.066	0.597
1440	0.07	0.607
1470	0.073	0.613
1500	0.074	0.629
1530	0.075	0.629
1560	0.074	0.646
1590	0.074	0.65
1620	0.078	0.662
1650	0.08	0.673
1680	0.083	0.678
1710	0.079	0.687
1740	0.082	0.692
1770	0.087	0.697
1800	0.089	0.708
1830	0.089	0.719
1860	0.09	0.723
1890	0.091	0.736
1920	0.09	0.734
1950	0.092	0.751
1980	0.095	0.748
2010	0.094	0.761
2040	0.096	0.768
2070	0.097	0.774
2100	0.104	0.783
2130	0.101	0.782
2160	0.103	0.789
2190	0.106	0.797
2220	0.1	0.804
2250	0.104	0.811
2280	0.106	0.813
2310	0.111	0.823
2340	0.108	0.829
2370	0.113	0.833
2400	0.111	0.833
2430	0.116	0.844
2460	0.115	0.858
2490	0.122	0.861
2520	0.119	0.869
2550	0.126	0.874
2580	0.123	0.879
2610	0.123	0.885
2640	0.126	0.898
2670	0.125	0.9
2700	0.125	0.9
2730	0.13	0.913
2760	0.133	0.917
2790	0.133	0.918
2820	0.139	0.924
2850	0.132	0.926
2880	0.137	0.927
2910	0.141	0.935
2940	0.141	0.939
2970	0.146	0.937
3000	0.14	0.949
3030	0.142	0.95
3060	0.147	0.957
3090	0.144	0.964
3120	0.15	0.966
3150	0.154	0.97
3180	0.149	0.971
3210	0.153	0.986
3240	0.157	0.98
3270	0.155	0.985
3300	0.157	0.978
3330	0.162	0.986
3360	0.161	0.993
3390	0.161	1
3420	0.171	0.994
3450	0.164	0.997
3480	0.167	1.001
3510	0.167	0.994
3540	0.168	1.002
3570	0.173	1.002
3600	0.172	1.009
3630	0.176	1.008
3660	0.175	1.005
3690	0.176	1.011
3720	0.182	1.013
3750	0.183	1.011
3780	0.179	1.017
3810	0.182	1.014
3840	0.186	1.018
3870	0.185	1.019
3900	0.184	1.025
3930	0.186	1.021
3960	0.194	1.025
3990	0.193	1.024
4020	0.193	1.024
4050	0.203	1.027
4080	0.2	1.031
4110	0.198	1.022
4140	0.203	1.026
4170	0.197	1.03
4200	0.204	1.027
4230	0.202	1.029
4260	0.204	1.034
4290	0.207	1.032
4320	0.208	1.034
4350	0.207	1.027
4380	0.212	1.028
4410	0.214	1.035
4440	0.215	1.033
4470	0.218	1.035
4500	0.222	1.035
4530	0.22	1.036
4560	0.222	1.036
4590	0.221	1.032
4620	0.223	1.035
4650	0.224	1.034
4680	0.225	1.033
4710	0.228	1.04
4740	0.231	1.033
4770	0.226	1.035
4800	0.229	1.037
4830	0.231	1.044
4860	0.237	1.039
4890	0.23	1.038
4920	0.237	1.031
4950	0.241	1.038
4980	0.242	1.031
5010	0.241	1.04
5040	0.241	1.039
5070	0.243	1.034
5100	0.246	1.035
5130	0.246	1.032
5160	0.25	1.038
5190	0.247	1.042
5220	0.253	1.039
5250	0.256	1.036
5280	0.254	1.037
5310	0.258	1.043
5340	0.263	1.041
5370	0.262	1.038
