# Supplementary material for: MukB ATPases are regulated independently by the N- and C-terminal domains of MukF kleisin
Source: eLife journal article supplement (doi:10.7554/elife.31522), 2018-01-11
Supplement: supp [file elife-31522-supp-v1.zip › elife_poa_e31522_Figure_6_figure_supplement_1.pdf]

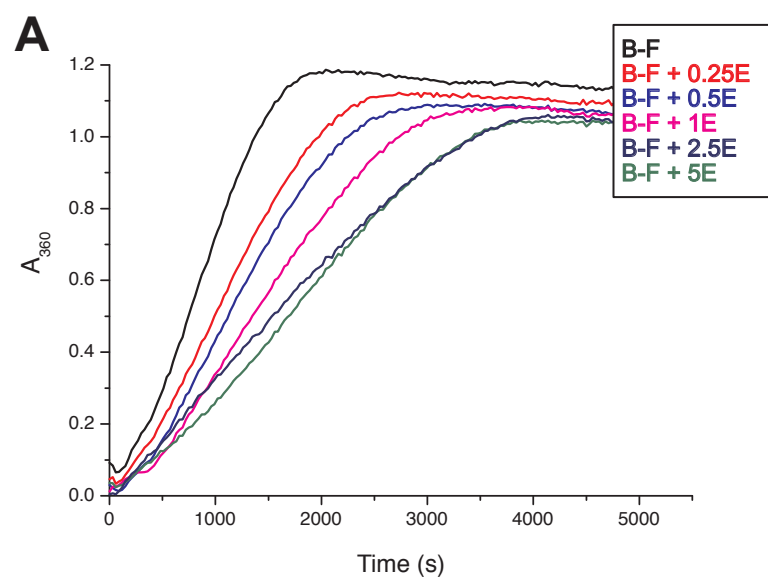

|                         | B-F    | B-F + 0.25E | B-F + 0.5E | B-F + 1E  | B-F + 2.5E | B-F + 5E  |
|-------------------------|--------|-------------|------------|-----------|------------|-----------|
| ATP molec/<br>dimer/min | 17 ± 2 | 10.8 ± 3.3  | 10.4 ± 3.4 | 9.2 ± 2.4 | 5.3 ± 1.6  | 4.4 ± 1.7 |
| % activity              | 100    | 75 ± 9      | 63 ± 10    | 57 ± 13   | 31 ± 4.5   | 26 ± 6    |

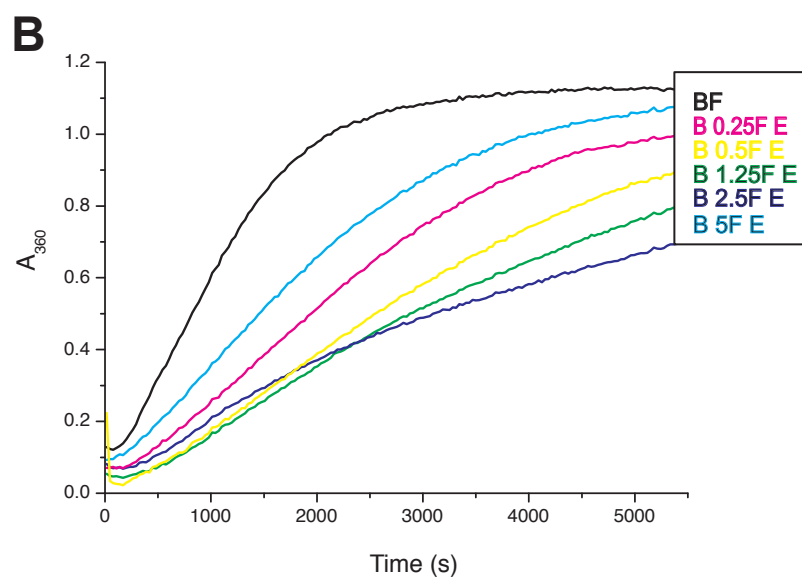

|                         | B-F    | B-0.25F-E  | B-0.5F-E   | B-1.25F-E | B-2.5F-E | B-5F-E  |
|-------------------------|--------|------------|------------|-----------|----------|---------|
| ATP molec/<br>dimer/min | 17 ± 2 | 11.6 ± 1.4 | 10.3 ± 1.5 | 7 ± 0.4   | 6 ± 1.7  | 15 ± 2  |
| % activity              | 100    | 64 ± 7     | 56 ± 7     | 38 ± 3    | 34 ± 7   | 82 ± 10 |

Figure 6 - figure supplement 1; Zawadzka et al.
