# Supplementary material for: MukB ATPases are regulated independently by the N- and C-terminal domains of MukF kleisin
Source: eLife journal article supplement (doi:10.7554/elife.31522), 2018-01-11
Supplement: supp [file elife-31522-supp-v1.zip › elife_poa_e31522_Figure_6_figure_supplement_1_source_data_1.xlsx]

## Sheet: A
Time (seconds)	B:F:0.25E	B:F:0.5E	B:F:1.25E	B:F:2.5E	B:F:5E
0	0.064	0.05	0.094	0.069	0.098
30	0.057	0.038	0.085	0.06	0.081
60	0.043	0.033	0.079	0.052	0.072
90	0.036	0.028	0.069	0.046	0.067
120	0.027	0.012	0.066	0.043	0.049
150	0.02	0.011	0.056	0.037	0.042
180	0.033	0.014	0.061	0.05	0.042
210	0.043	0.017	0.062	0.052	0.045
240	0.054	0.024	0.067	0.063	0.052
270	0.073	0.032	0.075	0.076	0.064
300	0.089	0.04	0.08	0.086	0.071
330	0.108	0.06	0.092	0.101	0.088
360	0.117	0.064	0.106	0.107	0.093
390	0.125	0.075	0.113	0.117	0.108
420	0.133	0.089	0.128	0.136	0.13
450	0.137	0.104	0.148	0.151	0.136
480	0.142	0.107	0.159	0.159	0.14
510	0.152	0.117	0.174	0.169	0.148
540	0.166	0.138	0.196	0.187	0.162
570	0.172	0.15	0.204	0.199	0.164
600	0.189	0.163	0.224	0.21	0.174
630	0.204	0.177	0.235	0.224	0.178
660	0.221	0.193	0.252	0.236	0.187
690	0.24	0.206	0.265	0.246	0.196
720	0.266	0.227	0.289	0.262	0.204
750	0.281	0.242	0.297	0.275	0.215
780	0.299	0.258	0.311	0.288	0.221
810	0.323	0.275	0.328	0.296	0.232
840	0.343	0.288	0.341	0.307	0.233
870	0.367	0.307	0.353	0.315	0.246
900	0.388	0.316	0.364	0.324	0.244
930	0.396	0.329	0.375	0.328	0.247
960	0.423	0.35	0.394	0.342	0.262
990	0.453	0.372	0.411	0.354	0.274
1020	0.467	0.38	0.418	0.364	0.27
1050	0.496	0.406	0.436	0.372	0.281
1080	0.516	0.424	0.451	0.38	0.296
1110	0.533	0.431	0.465	0.39	0.297
1140	0.56	0.452	0.48	0.395	0.304
1170	0.567	0.457	0.483	0.402	0.301
1200	0.587	0.476	0.501	0.417	0.307
1230	0.613	0.495	0.515	0.423	0.315
1260	0.635	0.518	0.539	0.431	0.332
1290	0.655	0.53	0.547	0.439	0.336
1320	0.676	0.552	0.563	0.443	0.341
1350	0.689	0.56	0.581	0.449	0.343
1380	0.706	0.573	0.589	0.463	0.35
1410	0.734	0.6	0.606	0.471	0.358
1440	0.747	0.61	0.622	0.475	0.363
1470	0.768	0.625	0.633	0.482	0.37
1500	0.783	0.64	0.647	0.491	0.378
1530	0.798	0.65	0.647	0.495	0.376
1560	0.808	0.665	0.66	0.505	0.375
1590	0.833	0.687	0.681	0.514	0.397
1620	0.855	0.706	0.704	0.528	0.403
1650	0.869	0.723	0.716	0.528	0.41
1680	0.888	0.731	0.725	0.538	0.414
1710	0.902	0.75	0.74	0.542	0.413
1740	0.907	0.758	0.755	0.549	0.423
1770	0.921	0.768	0.756	0.551	0.418
1800	0.936	0.786	0.767	0.562	0.427
1830	0.945	0.796	0.779	0.569	0.43
1860	0.968	0.822	0.8	0.578	0.441
1890	0.987	0.835	0.817	0.584	0.452
1920	0.998	0.847	0.827	0.592	0.456
1950	1.018	0.868	0.843	0.6	0.468
1980	1.029	0.878	0.858	0.61	0.475
2010	1.031	0.88	0.865	0.61	0.475
2040	1.046	0.893	0.878	0.621	0.483
2070	1.039	0.893	0.865	0.613	0.473
2100	1.052	0.91	0.885	0.627	0.483
2130	1.064	0.922	0.897	0.638	0.489
2160	1.081	0.943	0.919	0.649	0.5
2190	1.092	0.954	0.926	0.65	0.51
2220	1.084	0.953	0.924	0.65	0.504
2250	1.094	0.966	0.937	0.661	0.513
2280	1.103	0.979	0.953	0.67	0.523
2310	1.116	0.992	0.967	0.674	0.532
2340	1.113	0.99	0.961	0.675	0.531
2370	1.116	1	0.971	0.681	0.532
2400	1.117	1.004	0.978	0.685	0.536
2430	1.121	1.013	0.989	0.696	0.544
2460	1.143	1.035	1.01	0.705	0.558
2490	1.137	1.043	1.021	0.712	0.565
2520	1.132	1.036	1.016	0.712	0.565
2550	1.139	1.05	1.032	0.719	0.572
2580	1.139	1.056	1.036	0.725	0.575
2610	1.138	1.056	1.047	0.73	0.582
2640	1.144	1.067	1.057	0.734	0.584
2670	1.14	1.065	1.059	0.741	0.59
2700	1.139	1.067	1.063	0.742	0.595
2730	1.15	1.078	1.074	0.756	0.605
2760	1.149	1.08	1.076	0.757	0.609
2790	1.141	1.081	1.083	0.765	0.613
2820	1.147	1.08	1.086	0.765	0.615
2850	1.142	1.083	1.088	0.772	0.621
2880	1.142	1.082	1.087	0.778	0.628
2910	1.143	1.082	1.09	0.784	0.636
2940	1.138	1.088	1.095	0.791	0.638
2970	1.143	1.09	1.092	0.796	0.644
3000	1.143	1.095	1.098	0.803	0.652
3030	1.137	1.095	1.095	0.803	0.653
3060	1.131	1.088	1.087	0.802	0.651
3090	1.124	1.074	1.083	0.804	0.652
3120	1.119	1.078	1.083	0.808	0.658
3150	1.117	1.077	1.081	0.811	0.66
3180	1.129	1.083	1.088	0.818	0.666
3210	1.129	1.091	1.09	0.831	0.677
3240	1.123	1.078	1.085	0.828	0.676
3270	1.122	1.081	1.084	0.831	0.681
3300	1.127	1.081	1.088	0.841	0.686
3330	1.12	1.076	1.084	0.841	0.688
3360	1.121	1.077	1.081	0.843	0.692
3390	1.121	1.08	1.088	0.851	0.698
3420	1.111	1.066	1.076	0.846	0.696
3450	1.102	1.065	1.071	0.844	0.688
3480	1.105	1.063	1.067	0.85	0.7
3510	1.095	1.055	1.064	0.846	0.694
3540	1.098	1.056	1.063	0.851	0.694
3570	1.102	1.061	1.069	0.859	0.705
3600	1.105	1.064	1.073	0.867	0.718
3630	1.094	1.047	1.056	0.857	0.706
3660	1.085	1.044	1.054	0.858	0.705
3690	1.089	1.048	1.053	0.869	0.715
3720	1.091	1.047	1.053	0.871	0.714
3750	1.082	1.046	1.049	0.866	0.719
3780	1.084	1.047	1.052	0.871	0.722
3810	1.098	1.059	1.059	0.883	0.732
3840	1.097	1.055	1.062	0.888	0.742
3870	1.095	1.059	1.063	0.891	0.742
3900	1.098	1.062	1.067	0.899	0.752
3930	1.089	1.055	1.057	0.895	0.75
3960	1.099	1.061	1.06	0.911	0.757
3990	1.101	1.061	1.07	0.911	0.768
4020	1.1	1.065	1.066	0.921	0.771
4050	1.103	1.065	1.067	0.927	0.772
4080	1.108	1.064	1.067	0.923	0.78
4110	1.107	1.068	1.069	0.93	0.785
4140	1.112	1.071	1.073	0.933	0.79
4170	1.107	1.066	1.065	0.931	0.79
4200	1.103	1.063	1.062	0.941	0.796
4230	1.1	1.061	1.061	0.936	0.797
4260	1.099	1.059	1.064	0.934	0.803
4290	1.091	1.053	1.052	0.93	0.793
4320	1.087	1.052	1.054	0.929	0.794
4350	1.08	1.045	1.046	0.927	0.794
4380	1.071	1.037	1.035	0.924	0.788
4410	1.064	1.035	1.037	0.919	0.785
4440	1.064	1.03	1.031	0.922	0.791
4470	1.051	1.021	1.019	0.903	0.779
4500	1.045	1.01	1.005	0.9	0.774
4530	1.039	0.999	0.999	0.891	0.767
4560	1.035	0.995	0.99	0.887	0.768
4590	1.037	0.998	0.989	0.89	0.768
4620	1.043	0.997	0.994	0.898	0.779
4650	1.043	1.005	1	0.902	0.788
4680	1.052	1.015	1.009	0.915	0.804
4710	1.044	1.009	1.006	0.91	0.801
4740	1.042	1.007	0.999	0.909	0.802
4770	1.043	1.01	1.004	0.909	0.81
4800	1.04	1.012	0.999	0.909	0.809
4830	1.041	1.011	1.004	0.911	0.816
4860	1.042	1.009	1.001	0.914	0.822
4890	1.035	1.005	1.001	0.91	0.817
4920	1.016	0.991	0.988	0.9	0.803
4950	1.035	1.013	1.006	0.925	0.832
4980	1.03	1.005	0.998	0.913	0.821
5010	1.034	1.011	1.006	0.918	0.826
5040	1.039	1.014	1.008	0.92	0.833
5070	1.033	1.007	1	0.918	0.827
5100	1.035	1.009	1.001	0.919	0.833
5130	1.032	1.015	1.004	0.922	0.834
5160	1.027	1.006	0.997	0.917	0.835
5190	1.025	1.007	0.994	0.922	0.839
5220	1.029	1.008	0.999	0.92	0.839
5250	1.024	1.005	0.991	0.915	0.841
5280	1.021	0.993	0.987	0.915	0.835
5310	1.017	0.993	0.983	0.911	0.831
5340	1.017	0.993	0.983	0.913	0.838
5370	1.018	0.989	0.986	0.917	0.84

## Sheet: B
Time (seconds)	0.5B:1.25F	0.5B:5E+9:0.25F	0.5B:5E+9:0.5F	0.5B:5E+9:1.25F	0.5B:5E+9:2.5F	0.5B:5E+9:5F
0	0.19	0.107	0.324	0.084	0.123	0.139
30	0.182	0.107	0.056	0.076	0.111	0.142
60	0.179	0.112	0.047	0.074	0.106	0.142
90	0.186	0.105	0.044	0.075	0.109	0.154
120	0.194	0.112	0.043	0.072	0.11	0.161
150	0.204	0.106	0.039	0.068	0.104	0.158
180	0.221	0.114	0.05	0.073	0.108	0.17
210	0.24	0.118	0.056	0.077	0.112	0.181
240	0.259	0.126	0.066	0.081	0.112	0.189
270	0.28	0.132	0.069	0.083	0.115	0.199
300	0.315	0.144	0.081	0.09	0.129	0.217
330	0.343	0.152	0.084	0.096	0.131	0.231
360	0.366	0.158	0.093	0.093	0.13	0.235
390	0.391	0.166	0.09	0.094	0.138	0.248
420	0.424	0.183	0.112	0.108	0.151	0.268
450	0.45	0.187	0.114	0.105	0.157	0.279
480	0.471	0.197	0.123	0.114	0.162	0.292
510	0.495	0.216	0.128	0.124	0.168	0.306
540	0.511	0.215	0.133	0.121	0.172	0.317
570	0.539	0.225	0.143	0.13	0.183	0.327
600	0.569	0.237	0.152	0.139	0.192	0.343
630	0.591	0.25	0.159	0.15	0.202	0.357
660	0.618	0.264	0.169	0.156	0.209	0.372
690	0.637	0.268	0.167	0.161	0.214	0.379
720	0.665	0.277	0.175	0.168	0.227	0.394
750	0.691	0.293	0.19	0.178	0.234	0.415
780	0.72	0.305	0.208	0.188	0.246	0.432
810	0.741	0.317	0.214	0.193	0.257	0.443
840	0.763	0.324	0.219	0.202	0.262	0.459
870	0.791	0.335	0.223	0.208	0.271	0.472
900	0.815	0.343	0.237	0.217	0.279	0.481
930	0.84	0.357	0.244	0.227	0.294	0.498
960	0.877	0.379	0.268	0.248	0.31	0.521
990	0.893	0.382	0.269	0.245	0.313	0.528
1020	0.909	0.385	0.275	0.254	0.319	0.539
1050	0.946	0.405	0.289	0.271	0.329	0.557
1080	0.962	0.417	0.301	0.278	0.344	0.577
1110	0.979	0.423	0.299	0.28	0.348	0.586
1140	1.007	0.438	0.314	0.287	0.355	0.601
1170	1.021	0.446	0.321	0.299	0.361	0.615
1200	1.048	0.46	0.331	0.306	0.367	0.626
1230	1.071	0.47	0.343	0.315	0.378	0.643
1260	1.087	0.483	0.343	0.323	0.383	0.651
1290	1.112	0.5	0.361	0.337	0.388	0.673
1320	1.127	0.503	0.366	0.343	0.396	0.683
1350	1.147	0.52	0.38	0.349	0.409	0.695
1380	1.166	0.536	0.388	0.361	0.414	0.713
1410	1.181	0.543	0.399	0.368	0.421	0.726
1440	1.194	0.556	0.406	0.372	0.423	0.741
1470	1.21	0.566	0.418	0.387	0.434	0.756
1500	1.232	0.582	0.428	0.395	0.441	0.768
1530	1.246	0.59	0.436	0.402	0.453	0.783
1560	1.26	0.603	0.445	0.41	0.453	0.785
1590	1.272	0.613	0.455	0.421	0.465	0.805
1620	1.282	0.624	0.458	0.424	0.467	0.819
1650	1.301	0.639	0.475	0.436	0.477	0.836
1680	1.312	0.648	0.48	0.447	0.482	0.842
1710	1.324	0.658	0.493	0.451	0.494	0.855
1740	1.333	0.672	0.5	0.461	0.494	0.868
1770	1.341	0.684	0.514	0.469	0.506	0.88
1800	1.351	0.688	0.517	0.474	0.508	0.885
1830	1.37	0.707	0.532	0.483	0.517	0.907
1860	1.376	0.716	0.538	0.49	0.523	0.915
1890	1.383	0.727	0.548	0.503	0.529	0.933
1920	1.395	0.738	0.56	0.509	0.533	0.941
1950	1.402	0.75	0.566	0.52	0.54	0.952
1980	1.416	0.765	0.573	0.526	0.546	0.965
2010	1.423	0.775	0.586	0.533	0.554	0.978
2040	1.424	0.788	0.593	0.542	0.562	0.987
2070	1.438	0.796	0.602	0.558	0.563	0.998
2100	1.444	0.81	0.615	0.563	0.575	1.013
2130	1.453	0.821	0.625	0.567	0.575	1.023
2160	1.455	0.834	0.633	0.573	0.581	1.031
2190	1.456	0.837	0.637	0.582	0.584	1.04
2220	1.465	0.854	0.643	0.587	0.594	1.053
2250	1.475	0.864	0.659	0.601	0.598	1.066
2280	1.474	0.874	0.665	0.6	0.602	1.072
2310	1.472	0.883	0.674	0.607	0.609	1.078
2340	1.485	0.889	0.684	0.618	0.611	1.089
2370	1.482	0.901	0.695	0.625	0.621	1.102
2400	1.492	0.915	0.701	0.633	0.625	1.11
2430	1.497	0.925	0.713	0.641	0.628	1.118
2460	1.506	0.935	0.72	0.649	0.64	1.129
2490	1.508	0.949	0.73	0.655	0.638	1.134
2520	1.511	0.952	0.732	0.662	0.645	1.144
2550	1.521	0.961	0.744	0.669	0.652	1.153
2580	1.516	0.971	0.755	0.675	0.657	1.163
2610	1.521	0.982	0.762	0.684	0.66	1.17
2640	1.529	0.991	0.77	0.69	0.665	1.181
2670	1.528	1.004	0.784	0.699	0.671	1.194
2700	1.535	1.014	0.79	0.706	0.68	1.202
2730	1.53	1.019	0.794	0.705	0.675	1.2
2760	1.535	1.028	0.802	0.717	0.68	1.21
2790	1.534	1.03	0.804	0.72	0.685	1.218
2820	1.539	1.048	0.823	0.729	0.695	1.233
2850	1.543	1.058	0.826	0.737	0.699	1.236
2880	1.541	1.066	0.834	0.737	0.7	1.24
2910	1.548	1.075	0.84	0.748	0.704	1.253
2940	1.546	1.074	0.846	0.751	0.707	1.256
2970	1.547	1.089	0.856	0.759	0.716	1.271
3000	1.552	1.095	0.858	0.761	0.72	1.27
3030	1.552	1.099	0.875	0.772	0.725	1.282
3060	1.557	1.115	0.879	0.774	0.733	1.287
3090	1.56	1.12	0.89	0.784	0.732	1.298
3120	1.554	1.124	0.894	0.788	0.731	1.299
3150	1.558	1.133	0.895	0.792	0.741	1.307
3180	1.557	1.138	0.901	0.797	0.739	1.302
3210	1.574	1.154	0.92	0.81	0.754	1.323
3240	1.561	1.154	0.921	0.812	0.751	1.325
3270	1.573	1.167	0.933	0.822	0.759	1.331
3300	1.575	1.173	0.938	0.827	0.759	1.342
3330	1.573	1.18	0.947	0.831	0.771	1.346
3360	1.575	1.186	0.949	0.835	0.769	1.345
3390	1.57	1.193	0.957	0.838	0.77	1.343
3420	1.579	1.196	0.963	0.843	0.774	1.359
3450	1.572	1.205	0.964	0.852	0.777	1.356
3480	1.576	1.214	0.979	0.854	0.784	1.367
3510	1.577	1.217	0.981	0.858	0.788	1.369
3540	1.586	1.231	0.998	0.874	0.8	1.385
3570	1.587	1.236	1.002	0.877	0.798	1.386
3600	1.579	1.238	1.005	0.876	0.802	1.383
3630	1.578	1.244	1.005	0.879	0.803	1.391
3660	1.588	1.25	1.024	0.891	0.812	1.397
3690	1.583	1.251	1.022	0.894	0.808	1.402
3720	1.589	1.262	1.028	0.899	0.817	1.405
3750	1.593	1.265	1.038	0.909	0.822	1.416
3780	1.592	1.274	1.043	0.912	0.818	1.414
3810	1.589	1.276	1.052	0.918	0.828	1.417
3840	1.591	1.279	1.059	0.924	0.833	1.424
3870	1.594	1.292	1.063	0.929	0.833	1.427
3900	1.589	1.291	1.067	0.934	0.838	1.425
3930	1.593	1.3	1.073	0.935	0.848	1.432
3960	1.591	1.297	1.078	0.941	0.84	1.429
3990	1.591	1.306	1.085	0.949	0.852	1.44
4020	1.589	1.31	1.089	0.951	0.853	1.44
4050	1.601	1.32	1.1	0.96	0.865	1.445
4080	1.591	1.322	1.105	0.96	0.861	1.446
4110	1.601	1.33	1.109	0.97	0.868	1.453
4140	1.598	1.331	1.116	0.973	0.874	1.452
4170	1.603	1.339	1.12	0.983	0.879	1.458
4200	1.598	1.339	1.124	0.981	0.874	1.455
4230	1.6	1.347	1.136	0.991	0.882	1.469
4260	1.596	1.353	1.138	0.997	0.88	1.467
4290	1.6	1.351	1.145	1.001	0.888	1.468
4320	1.601	1.357	1.147	1.006	0.893	1.47
4350	1.605	1.363	1.152	1.014	0.897	1.473
4380	1.608	1.366	1.163	1.014	0.905	1.479
4410	1.602	1.364	1.165	1.028	0.902	1.48
4440	1.605	1.365	1.171	1.024	0.904	1.478
4470	1.6	1.369	1.176	1.03	0.909	1.482
4500	1.603	1.37	1.184	1.031	0.912	1.484
4530	1.609	1.373	1.19	1.04	0.916	1.489
4560	1.605	1.375	1.191	1.038	0.92	1.488
4590	1.608	1.379	1.199	1.051	0.921	1.493
4620	1.6	1.38	1.2	1.052	0.924	1.495
4650	1.601	1.376	1.208	1.059	0.925	1.497
4680	1.601	1.378	1.207	1.062	0.931	1.492
4710	1.602	1.382	1.212	1.062	0.932	1.497
4740	1.601	1.392	1.216	1.069	0.939	1.496
4770	1.606	1.392	1.232	1.078	0.947	1.51
4800	1.601	1.391	1.228	1.082	0.948	1.509
4830	1.604	1.393	1.234	1.086	0.952	1.507
4860	1.606	1.401	1.238	1.093	0.955	1.511
4890	1.609	1.401	1.236	1.089	0.955	1.514
4920	1.605	1.399	1.237	1.097	0.956	1.511
4950	1.609	1.409	1.25	1.106	0.966	1.521
4980	1.606	1.415	1.251	1.115	0.977	1.53
5010	1.606	1.407	1.253	1.11	0.973	1.517
5040	1.6	1.407	1.248	1.11	0.972	1.516
5070	1.596	1.41	1.264	1.117	0.975	1.52
5100	1.604	1.415	1.266	1.128	0.985	1.529
5130	1.605	1.415	1.265	1.129	0.99	1.531
5160	1.602	1.418	1.273	1.135	0.99	1.533
5190	1.599	1.413	1.276	1.131	0.992	1.527
5220	1.601	1.418	1.277	1.14	0.993	1.534
5250	1.598	1.413	1.281	1.141	0.999	1.535
5280	1.599	1.424	1.29	1.148	1.006	1.538
5310	1.6	1.428	1.294	1.156	1.013	1.541
5340	1.6	1.423	1.298	1.157	1.011	1.544
