# Supplementary material for: MukB ATPases are regulated independently by the N- and C-terminal domains of MukF kleisin
Source: eLife journal article supplement (doi:10.7554/elife.31522), 2018-01-11
Supplement: supp [file elife-31522-supp-v1.zip › elife_poa_e31522_Figure_6_source_data_1.xlsx]

## Sheet: A
Time (seconds)	B:F	B:F:E
0	0.06	0.014
30	0.076	0.027
60	0.099	0.048
90	0.103	0.043
120	0.095	0.028
150	0.114	0.046
180	0.118	0.046
210	0.134	0.046
240	0.147	0.051
270	0.15	0.051
300	0.165	0.056
330	0.177	0.066
360	0.198	0.075
390	0.211	0.08
420	0.229	0.086
450	0.261	0.101
480	0.291	0.116
510	0.313	0.122
540	0.335	0.129
570	0.373	0.139
600	0.408	0.148
630	0.433	0.165
660	0.47	0.175
690	0.499	0.184
720	0.532	0.193
750	0.57	0.202
780	0.594	0.2
810	0.633	0.219
840	0.654	0.232
870	0.679	0.237
900	0.7	0.242
930	0.73	0.252
960	0.754	0.263
990	0.775	0.273
1020	0.798	0.283
1050	0.819	0.292
1080	0.838	0.303
1110	0.854	0.303
1140	0.88	0.317
1170	0.898	0.32
1200	0.913	0.332
1230	0.938	0.343
1260	0.951	0.342
1290	0.975	0.365
1320	0.992	0.37
1350	1.01	0.376
1380	1.026	0.388
1410	1.038	0.385
1440	1.056	0.398
1470	1.071	0.407
1500	1.088	0.417
1530	1.109	0.429
1560	1.122	0.437
1590	1.137	0.451
1620	1.146	0.458
1650	1.158	0.469
1680	1.165	0.472
1710	1.184	0.488
1740	1.196	0.491
1770	1.201	0.499
1800	1.209	0.508
1830	1.216	0.515
1860	1.23	0.531
1890	1.237	0.542
1920	1.241	0.549
1950	1.245	0.554
1980	1.254	0.565
2010	1.257	0.569
2040	1.257	0.583
2070	1.269	0.598
2100	1.27	0.604
2130	1.27	0.605
2160	1.27	0.617
2190	1.272	0.62
2220	1.271	0.629
2250	1.269	0.636
2280	1.274	0.647
2310	1.281	0.655
2340	1.288	0.672
2370	1.279	0.671
2400	1.279	0.676
2430	1.281	0.687
2460	1.278	0.692
2490	1.279	0.701
2520	1.287	0.717
2550	1.29	0.725
2580	1.279	0.726
2610	1.289	0.732
2640	1.291	0.741
2670	1.281	0.739
2700	1.292	0.763
2730	1.291	0.762
2760	1.296	0.77
2790	1.29	0.779
2820	1.286	0.781
2850	1.285	0.789
2880	1.291	0.798
2910	1.293	0.807
2940	1.289	0.809
2970	1.289	0.818
3000	1.293	0.823
3030	1.293	0.833
3060	1.294	0.84
3090	1.296	0.849
3120	1.3	0.855
3150	1.293	0.862
3180	1.297	0.868
3210	1.287	0.867
3240	1.294	0.88
3270	1.296	0.874
3300	1.289	0.884
3330	1.296	0.896
3360	1.298	0.894
3390	1.292	0.904
3420	1.294	0.909
3450	1.299	0.923
3480	1.293	0.921
3510	1.307	0.933
3540	1.299	0.937
3570	1.305	0.944
3600	1.297	0.944
3630	1.299	0.946
3660	1.294	0.953
3690	1.302	0.965
3720	1.303	0.965
3750	1.302	0.981
3780	1.299	0.975
3810	1.294	0.977
3840	1.297	0.985
3870	1.3	0.994
3900	1.3	0.997
3930	1.302	1.005
3960	1.297	1.006
3990	1.291	1.011
4020	1.306	1.016
4050	1.301	1.022
4080	1.297	1.026
4110	1.307	1.029
4140	1.295	1.031
4170	1.298	1.037
4200	1.303	1.047
4230	1.302	1.048
4260	1.296	1.049
4290	1.303	1.06
4320	1.299	1.061
4350	1.302	1.065
4380	1.309	1.075
4410	1.304	1.074
4440	1.3	1.075
4470	1.307	1.084
4500	1.294	1.081
4530	1.301	1.088
4560	1.306	1.098
4590	1.306	1.095
4620	1.302	1.097
4650	1.3	1.107
4680	1.302	1.103
4710	1.301	1.108
4740	1.297	1.111
4770	1.299	1.111
4800	1.308	1.119
4830	1.305	1.12
4860	1.308	1.12
4890	1.3	1.127
4920	1.298	1.127
4950	1.297	1.133
4980	1.298	1.129
5010	1.304	1.135
5040	1.3	1.135
5070	1.306	1.142
5100	1.306	1.147
5130	1.306	1.142
5160	1.303	1.142
5190	1.301	1.151
5220	1.304	1.149
5250	1.309	1.144
5280	1.297	1.152
5310	1.291	1.146
5340	1.303	1.154
5370	1.299	1.158

## Sheet: B
Time (seconds)	B:F	B:F:E	B:F:E+ DNA 1:5	B:F:E+ DNA 1:10	B:F+ DNA 1:10
0	-0.105	-0.137	-0.023	-0.067	0.075
30	-0.059	-0.103	-0.03	-0.076	0.06
60	-0.039	-0.076	-0.027	-0.062	0.067
90	-0.023	-0.055	-0.025	-0.052	0.088
120	0.005	-0.031	-0.007	-0.039	0.112
150	0.026	-0.011	-0.003	-0.031	0.125
180	0.06	0.03	0.018	-0.01	0.126
210	0.093	0.039	0.032	0.011	0.126
240	0.12	0.069	0.05	0.03	0.148
270	0.147	0.071	0.063	0.051	0.163
300	0.176	0.059	0.076	0.075	0.19
330	0.214	0.096	0.095	0.096	0.219
360	0.248	0.103	0.113	0.117	0.244
390	0.266	0.125	0.126	0.134	0.266
420	0.292	0.115	0.144	0.156	0.297
450	0.323	0.109	0.156	0.178	0.331
480	0.361	0.132	0.172	0.197	0.361
510	0.388	0.127	0.193	0.226	0.386
540	0.416	0.136	0.21	0.243	0.418
570	0.44	0.143	0.217	0.262	0.446
600	0.473	0.157	0.244	0.282	0.487
630	0.503	0.16	0.261	0.3	0.513
660	0.528	0.168	0.272	0.324	0.542
690	0.557	0.184	0.29	0.345	0.561
720	0.591	0.2	0.319	0.377	0.602
750	0.615	0.202	0.322	0.396	0.624
780	0.652	0.221	0.344	0.416	0.655
810	0.676	0.227	0.356	0.428	0.683
840	0.7	0.233	0.362	0.449	0.71
870	0.727	0.244	0.385	0.474	0.736
900	0.759	0.257	0.406	0.497	0.754
930	0.785	0.269	0.418	0.513	0.78
960	0.818	0.271	0.433	0.536	0.81
990	0.835	0.281	0.435	0.554	0.832
1020	0.864	0.283	0.456	0.563	0.85
1050	0.882	0.29	0.464	0.577	0.864
1080	0.915	0.31	0.484	0.606	0.893
1110	0.935	0.324	0.497	0.62	0.913
1140	0.958	0.327	0.51	0.642	0.939
1170	0.976	0.335	0.524	0.654	0.959
1200	1.005	0.348	0.542	0.678	0.975
1230	1.02	0.351	0.551	0.69	0.993
1260	1.032	0.359	0.565	0.705	1.007
1290	1.054	0.374	0.584	0.725	1.025
1320	1.074	0.388	0.6	0.738	1.041
1350	1.088	0.398	0.625	0.759	1.054
1380	1.099	0.408	0.636	0.771	1.073
1410	1.115	0.417	0.664	0.792	1.087
1440	1.119	0.421	0.667	0.797	1.093
1470	1.132	0.437	0.674	0.815	1.111
1500	1.142	0.439	0.698	0.832	1.12
1530	1.145	0.44	0.709	0.844	1.132
1560	1.156	0.464	0.729	0.867	1.142
1590	1.155	0.47	0.726	0.867	1.145
1620	1.16	0.478	0.727	0.884	1.156
1650	1.175	0.486	0.749	0.896	1.16
1680	1.168	0.493	0.754	0.912	1.165
1710	1.174	0.498	0.768	0.925	1.17
1740	1.174	0.502	0.785	0.933	1.17
1770	1.173	0.505	0.785	0.942	1.178
1800	1.179	0.512	0.802	0.955	1.182
1830	1.174	0.519	0.807	0.964	1.182
1860	1.18	0.531	0.823	0.98	1.184
1890	1.183	0.543	0.843	0.994	1.184
1920	1.184	0.55	0.852	1.004	1.185
1950	1.18	0.559	0.863	1.008	1.183
1980	1.181	0.555	0.87	1.017	1.183
2010	1.173	0.57	0.875	1.022	1.18
2040	1.173	0.571	0.883	1.031	1.187
2070	1.17	0.574	0.892	1.042	1.186
2100	1.176	0.583	0.904	1.048	1.176
2130	1.174	0.592	0.914	1.058	1.184
2160	1.176	0.593	0.922	1.075	1.188
2190	1.178	0.608	0.931	1.086	1.178
2220	1.175	0.613	0.939	1.086	1.184
2250	1.174	0.619	0.945	1.081	1.179
2280	1.171	0.622	0.955	1.084	1.18
2310	1.171	0.63	0.964	1.093	1.183
2340	1.176	0.647	0.969	1.106	1.175
2370	1.172	0.656	0.984	1.113	1.178
2400	1.175	0.652	0.992	1.117	1.175
2430	1.17	0.656	0.992	1.112	1.182
2460	1.168	0.667	1.002	1.126	1.179
2490	1.173	0.669	1.014	1.124	1.178
2520	1.163	0.674	1.012	1.117	1.174
2550	1.169	0.691	1.025	1.123	1.175
2580	1.169	0.691	1.026	1.119	1.168
2610	1.164	0.691	1.034	1.113	1.167
2640	1.169	0.696	1.039	1.108	1.165
2670	1.168	0.713	1.043	1.115	1.173
2700	1.163	0.722	1.051	1.119	1.174
2730	1.163	0.723	1.051	1.118	1.168
2760	1.165	0.726	1.057	1.123	1.166
2790	1.161	0.729	1.063	1.123	1.164
2820	1.164	0.732	1.067	1.13	1.164
2850	1.165	0.745	1.074	1.128	1.17
2880	1.166	0.747	1.079	1.125	1.162
2910	1.163	0.755	1.084	1.118	1.16
2940	1.156	0.755	1.081	1.115	1.158
2970	1.16	0.765	1.089	1.116	1.158
3000	1.165	0.769	1.085	1.109	1.167
3030	1.161	0.777	1.092	1.112	1.163
3060	1.166	0.781	1.095	1.115	1.158
3090	1.169	0.785	1.097	1.11	1.162
3120	1.159	0.787	1.1	1.114	1.153
3150	1.16	0.798	1.1	1.111	1.159
3180	1.163	0.8	1.103	1.111	1.159
3210	1.152	0.806	1.105	1.107	1.154
3240	1.162	0.812	1.108	1.11	1.161
3270	1.17	0.826	1.116	1.12	1.156
3300	1.167	0.831	1.119	1.118	1.156
3330	1.167	0.834	1.12	1.115	1.153
3360	1.168	0.834	1.12	1.118	1.153
3390	1.17	0.841	1.12	1.116	1.158
3420	1.157	0.836	1.11	1.105	1.158
3450	1.152	0.832	1.109	1.105	1.151
3480	1.136	0.819	1.093	1.092	1.151
3510	1.127	0.811	1.079	1.068	1.153
3540	1.122	0.815	1.082	1.066	1.155
3570	1.128	0.825	1.087	1.076	1.151
3600	1.144	0.843	1.107	1.084	1.152
3630	1.142	0.845	1.103	1.085	1.148
3660	1.159	0.872	1.123	1.106	1.15
3690	1.162	0.876	1.121	1.105	1.148
3720	1.161	0.882	1.125	1.107	1.152
3750	1.161	0.885	1.13	1.105	1.157
3780	1.159	0.888	1.125	1.103	1.15
3810	1.163	0.889	1.126	1.103	1.153
3840	1.162	0.899	1.127	1.106	1.148
3870	1.159	0.903	1.133	1.106	1.147
3900	1.162	0.905	1.131	1.112	1.145
3930	1.154	0.903	1.118	1.108	1.154
3960	1.161	0.915	1.127	1.116	1.16
3990	1.156	0.91	1.116	1.114	1.153
4020	1.152	0.905	1.112	1.113	1.157
4050	1.155	0.914	1.117	1.11	1.15
4080	1.153	0.916	1.116	1.108	1.157
4110	1.151	0.926	1.116	1.113	1.153
4140	1.152	0.925	1.11	1.103	1.156
4170	1.15	0.92	1.108	1.092	1.147
4200	1.154	0.927	1.113	1.103	1.148
4230	1.156	0.937	1.114	1.102	1.145
4260	1.147	0.932	1.114	1.1	1.14
4290	1.151	0.944	1.114	1.098	1.148
4320	1.146	0.941	1.114	1.092	1.137
4350	1.15	0.945	1.112	1.093	1.141
4380	1.149	0.947	1.109	1.097	1.137
4410	1.144	0.955	1.108	1.09	1.137
4440	1.146	0.958	1.104	1.093	1.134
4470	1.138	0.956	1.103	1.08	1.139
4500	1.133	0.955	1.098	1.082	1.133
4530	1.139	0.957	1.109	1.087	1.129
4560	1.142	0.968	1.099	1.087	1.137
4590	1.135	0.965	1.102	1.084	1.133
4620	1.136	0.965	1.1	1.088	1.136
4650	1.132	0.964	1.102	1.088	1.127
4680	1.138	0.977	1.1	1.089	1.131
4710	1.14	0.968	1.102	1.083	1.129
4740	1.132	0.975	1.098	1.087	1.13
4770	1.124	0.977	1.095	1.086	1.129
4800	1.132	0.979	1.1	1.09	1.131
4830	1.133	0.984	1.098	1.085	1.128
4860	1.127	0.977	1.095	1.081	1.128
4890	1.124	0.976	1.091	1.074	1.126
4920	1.126	0.975	1.091	1.078	1.122
4950	1.12	0.979	1.091	1.081	1.133
4980	1.122	0.979	1.093	1.076	1.126
5010	1.128	0.979	1.092	1.079	1.128
5040	1.122	0.979	1.089	1.077	1.129
5070	1.125	0.983	1.091	1.078	1.13
5100	1.119	0.984	1.088	1.075	1.133
5130	1.126	0.984	1.088	1.076	1.132
5160	1.121	0.991	1.089	1.074	1.136
5190	1.116	0.985	1.086	1.069	1.132
5220	1.119	0.986	1.089	1.076	1.13
5250	1.123	0.99	1.085	1.068	1.132
5280	1.117	0.988	1.087	1.073	1.137
5310	1.12	0.99	1.084	1.071	1.139
5340	1.122	0.988	1.085	1.071	1.134
5370	1.117	0.984	1.08	1.067	1.13
