# Supplementary material for: MukB ATPases are regulated independently by the N- and C-terminal domains of MukF kleisin
Source: eLife journal article supplement (doi:10.7554/elife.31522), 2018-01-11
Supplement: supp [file elife-31522-supp-v1.zip › elife_poa_e31522_Figure_8_source_data_1.xlsx]

## Sheet: Sheet1
number of foci within cells	% of cells
	day of repeat
C5 on glucose	27.09.16	12.10.16	14.10.16
0	5	13	17	11.6667	6.1101
1	34	43	45	40.6667	5.85947
2	51	40	33	41.3333	9.07377
3	10	3	4	5.66667	3.78594
				#DIV/0!	#DIV/0!
C5 ara20min				#DIV/0!	#DIV/0!
0	30	35	33	32.6667	2.51661
1	34	27	39	33.3333	6.02771
2	32	36	25	31	5.56776
3	4	1	3	2.66667	1.52753
				#DIV/0!	#DIV/0!
C5 ara40min				#DIV/0!	#DIV/0!
0	59	46	54	53	6.55744
1	30	45	31	35.3333	8.3865
2	11	9	14	11.3333	2.51661
3	0	0	0	0	0
				#DIV/0!	#DIV/0!
C5 ara60min				#DIV/0!	#DIV/0!
0	71	64	81	72	8.544
1	24	27	16	22.3333	5.68624
2	5	9	4	6	2.64575
3	0	0		0	0
				#DIV/0!	#DIV/0!
N2 gluc				#DIV/0!	#DIV/0!
0	33	34	38	35	2.64575
1	44	55	41	46.6667	7.37111
2	22	11	22	18.3333	6.35085
3	1	0	0	0.333333	0.57735
				#DIV/0!	#DIV/0!
N2 ara20min				#DIV/0!	#DIV/0!
0	78	77	87	80.6667	5.50757
1	19	18	11	16	4.3589
2	2	5	1	2.66667	2.08167
3	0	0	0	0	0
				#DIV/0!	#DIV/0!
N2 ara40min				#DIV/0!	#DIV/0!
0	92	96	97	95	2.64575
1	7	4	3	4.66667	2.08167
2	1	0	0	0.333333	0.57735
3	0	0	0	0	0
				#DIV/0!	#DIV/0!
N2 ara60min				#DIV/0!	#DIV/0!
0	97	97	99	97.6667	1.1547
1	3	3	1	2.33333	1.1547
2	0	0	0	0	0
3	0	0	0	0	0
				#DIV/0!	#DIV/0!
				#DIV/0!	#DIV/0!
empty plasmid				#DIV/0!	#DIV/0!
0	8	2	10	6.66667	4.16333
1	50	32	18	33.3333	16.0416
2	37	53	61	50.3333	12.2202
3	5	8	10	7.66667	2.51661
				#DIV/0!	#DIV/0!
empty plasmid after 1h ara				#DIV/0!	#DIV/0!
0	12	7	8	9	2.64575
1	43	38	38	39.6667	2.88675
2	43	48	51	47.3333	4.04145
3	2	5	2	3	1.73205
				#DIV/0!	#DIV/0!
				#DIV/0!	#DIV/0!
EQ empty				#DIV/0!	#DIV/0!
0	66	65	68	66.3333	1.52753
1	33	33	31	32.3333	1.1547
2	1	2	1	1.33333	0.57735
3	0	0	0	0	0
				#DIV/0!	#DIV/0!
EQ FC5gluc				#DIV/0!	#DIV/0!
0	68	60	66	64.6667	4.16333
1	29	38	33	33.3333	4.50925
2	2	2	1	1.66667	0.57735
3	0	0	0	0	0
				#DIV/0!	#DIV/0!
				#DIV/0!	#DIV/0!
EQ FC5ara20min				#DIV/0!	#DIV/0!
0	61	55	78	64.6667	11.9304
1	29	45	22	32	11.7898
2	0	0	1	0.333333	0.57735
3	0	0	0	0	0
				#DIV/0!	#DIV/0!
EQ FC5ara40min				#DIV/0!	#DIV/0!
0	54	58	83	65	15.7162
1	43	42	17	34	14.7309
2	4	0	0	1.33333	2.3094
3	0	0	0	0	0
				#DIV/0!	#DIV/0!
EQ FC5ara60min				#DIV/0!	#DIV/0!
0	59	51	85	65	17.7764
1	41	16	15	24	14.7309
2	0	3	0	1	1.73205
3	0	0	0	0	0
				#DIV/0!	#DIV/0!
EQ N2gluc				#DIV/0!	#DIV/0!
0	62	62	75	66.3333	7.50555
1	37	38	25	33.3333	7.23418
2	0	0	0	0	0
3	0	0	0	0	0
				#DIV/0!	#DIV/0!
EQ N2ara20min				#DIV/0!	#DIV/0!
0	78	67	47	64	15.7162
1	21	32	51	34.6667	15.1767
2	1	1	1	1	0
3	0	0	0	0	0
				#DIV/0!	#DIV/0!
EQ N2ara40min				#DIV/0!	#DIV/0!
0	70	62	67	66.3333	4.04145
1	30	38	33	33.6667	4.04145
2	0	0	0	0	0
3	0	0	0	0	0
				#DIV/0!	#DIV/0!
EQ N2ara60min				#DIV/0!	#DIV/0!
0	81	71	61	71	10
1	18	28	39	28.3333	10.504
2	0	1	0	0.333333	0.57735
3	0	0	0	0	0
