# Supplementary figures and images for: MukB ATPases are regulated independently by the N- and C-terminal domains of MukF kleisin
Source: eLife journal article supplement (doi:10.7554/elife.31522), 2018-01-11

**A**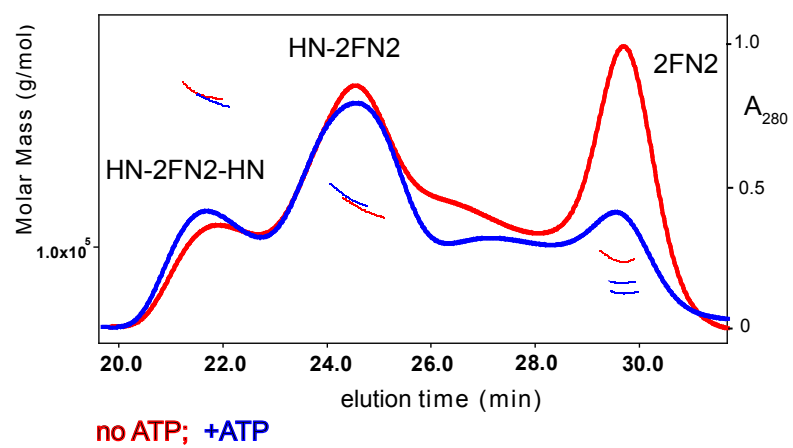**B**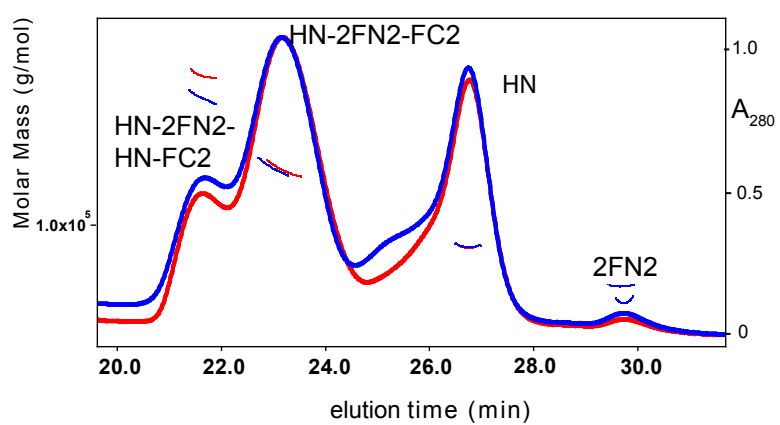

Figure 3 - figure supplement 2; Zawadzka et al.

Supplement: supp [file elife-31522-supp-v1.zip › elife_poa_e31522_Figure_3_figure_supplement_2.pdf]

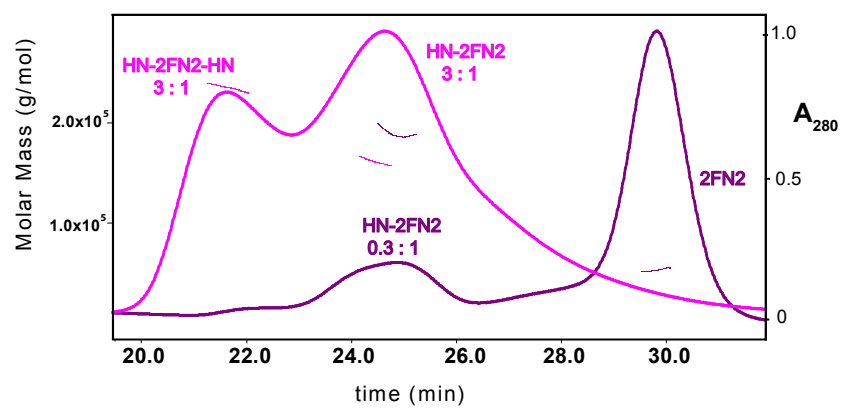

Figure 3 - figure supplement 1; Zawadzka et al.

Supplement: supp [file elife-31522-supp-v1.zip › elife_poa_e31522_Figure_3_figure_supplement_1.pdf]

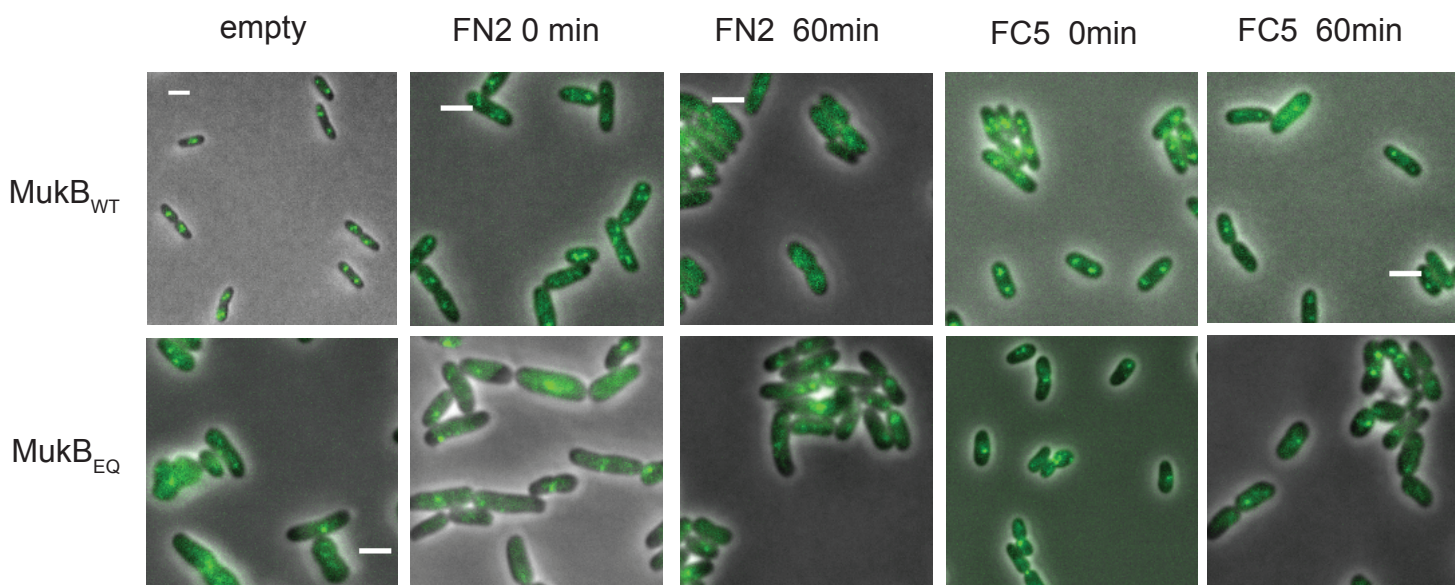

Figure 8 - figure supplement 1; Zawadzka et al.,

Supplement: supp [file elife-31522-supp-v1.zip › elife_poa_e31522_Figure_8_figure_supplement_1.pdf]

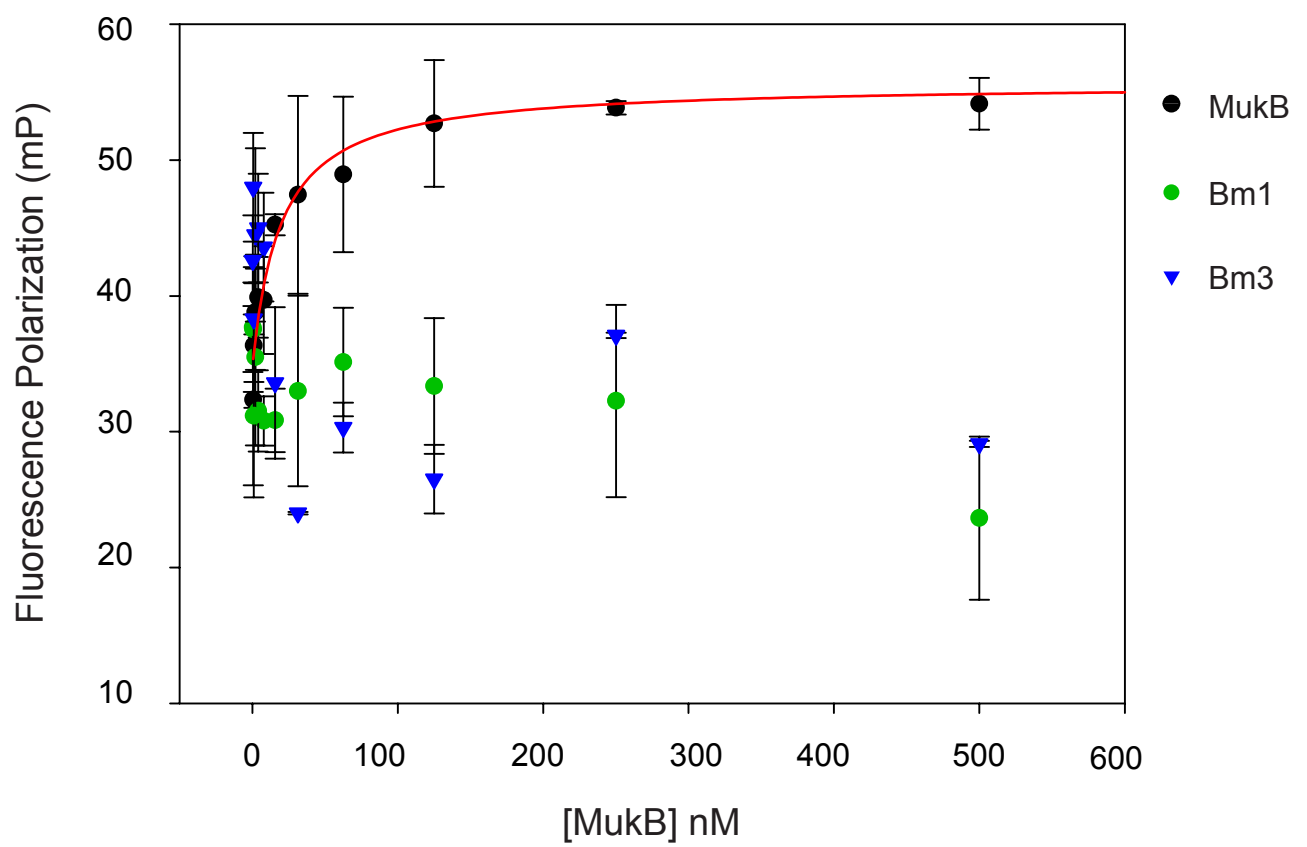

Figure 5 - figure supplement 4; Zawadzka et al.

Supplement: supp [file elife-31522-supp-v1.zip › elife_poa_e31522_Figure_5_figure_supplement_4.pdf]

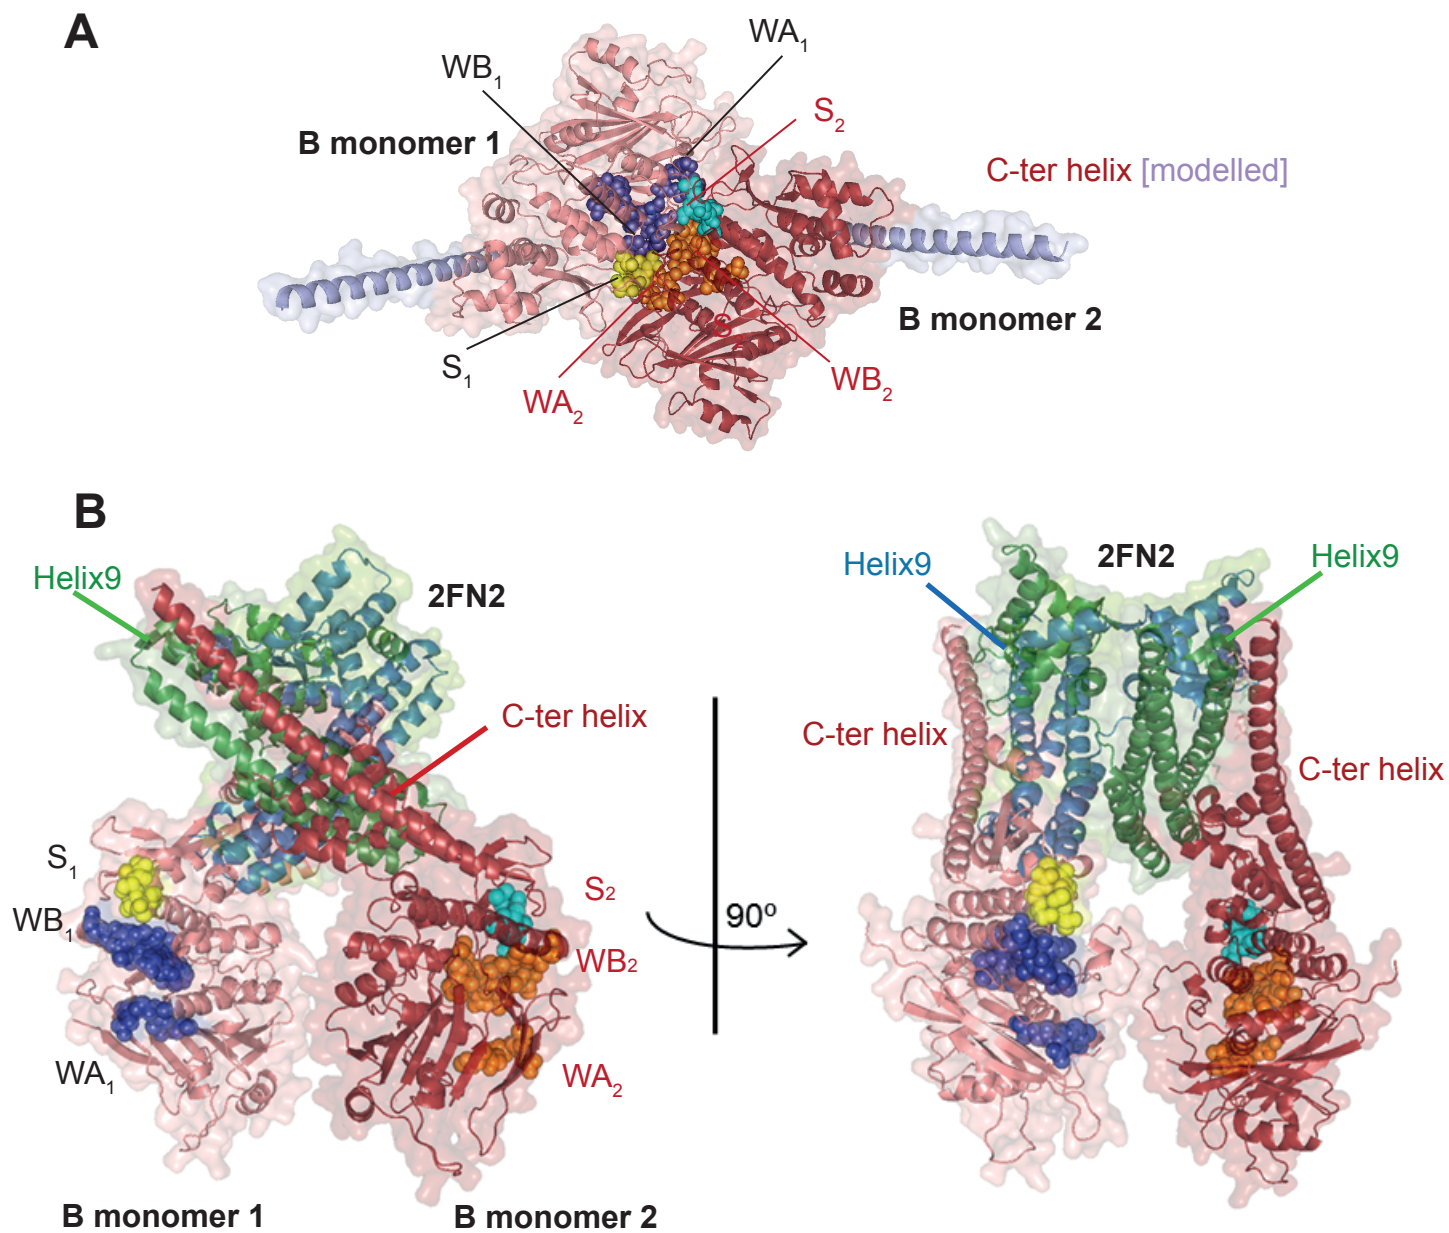

Figure 5 - figure supplement 6; Zawadzka et al.

Supplement: supp [file elife-31522-supp-v1.zip › elife_poa_e31522_Figure_5_figure_supplement_6.pdf]

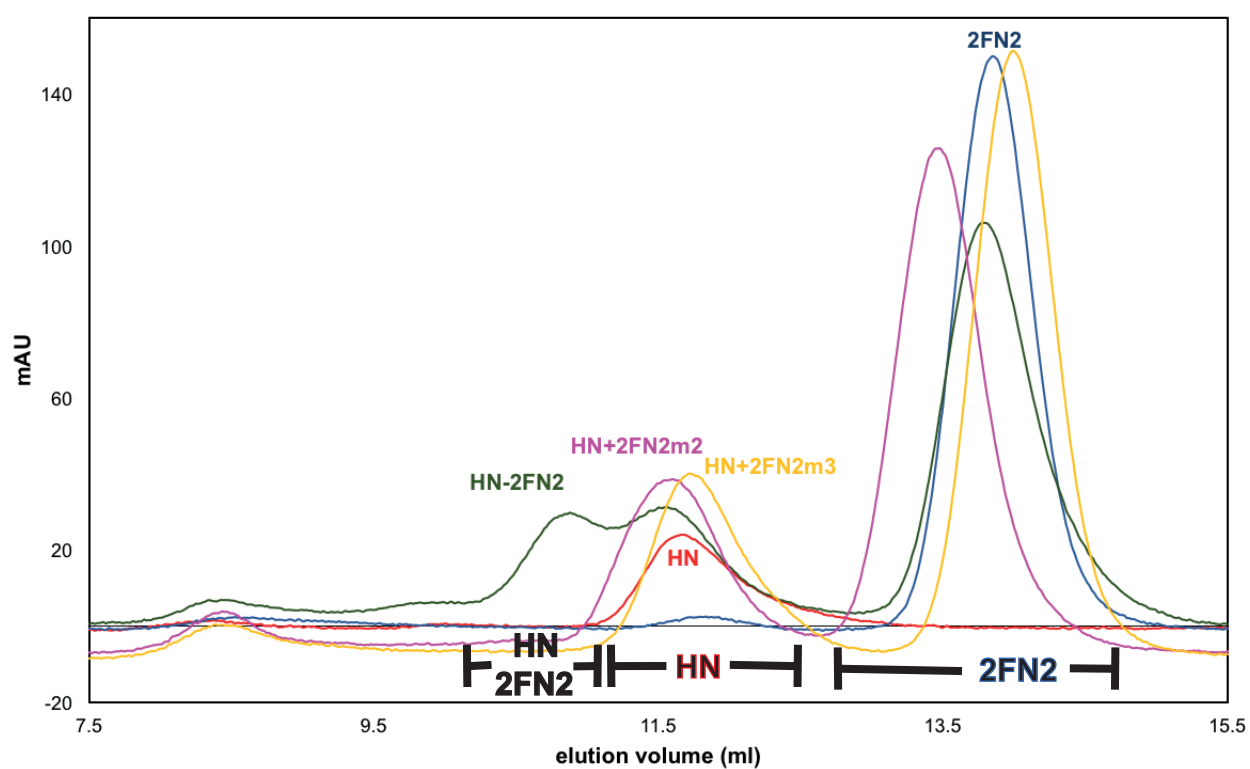

Figure 5 - figure supplement 1; Zawadzka et al.

Supplement: supp [file elife-31522-supp-v1.zip › elife_poa_e31522_Figure_5_figure_supplement_1.pdf]

22°C

37°C

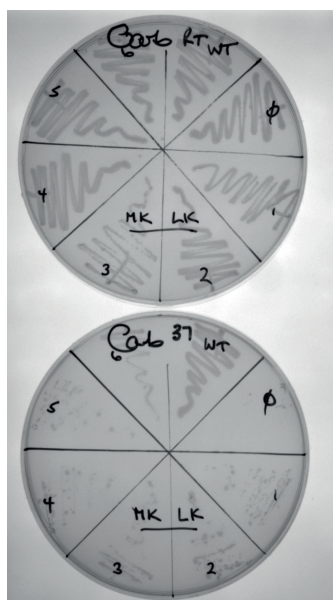

MukB m1

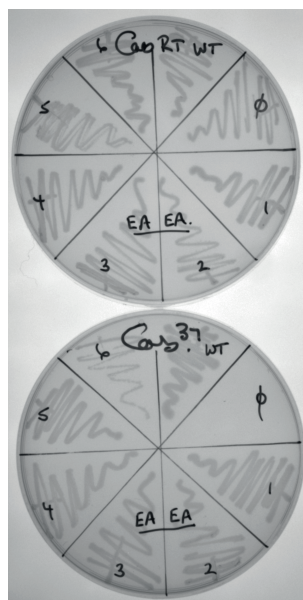

MukB m2

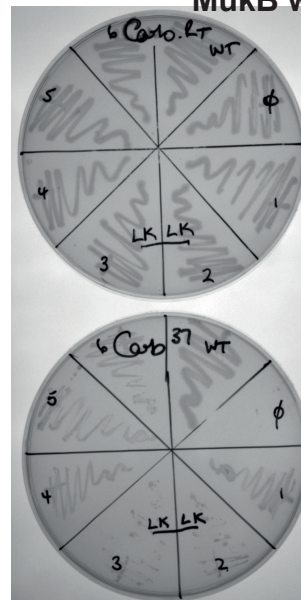

MukB m3

MukB wt

vector

Figure 5 - figure supplement 5; Zawadzka et al.

Supplement: supp [file elife-31522-supp-v1.zip › elife_poa_e31522_Figure_5_figure_supplement_5.pdf]

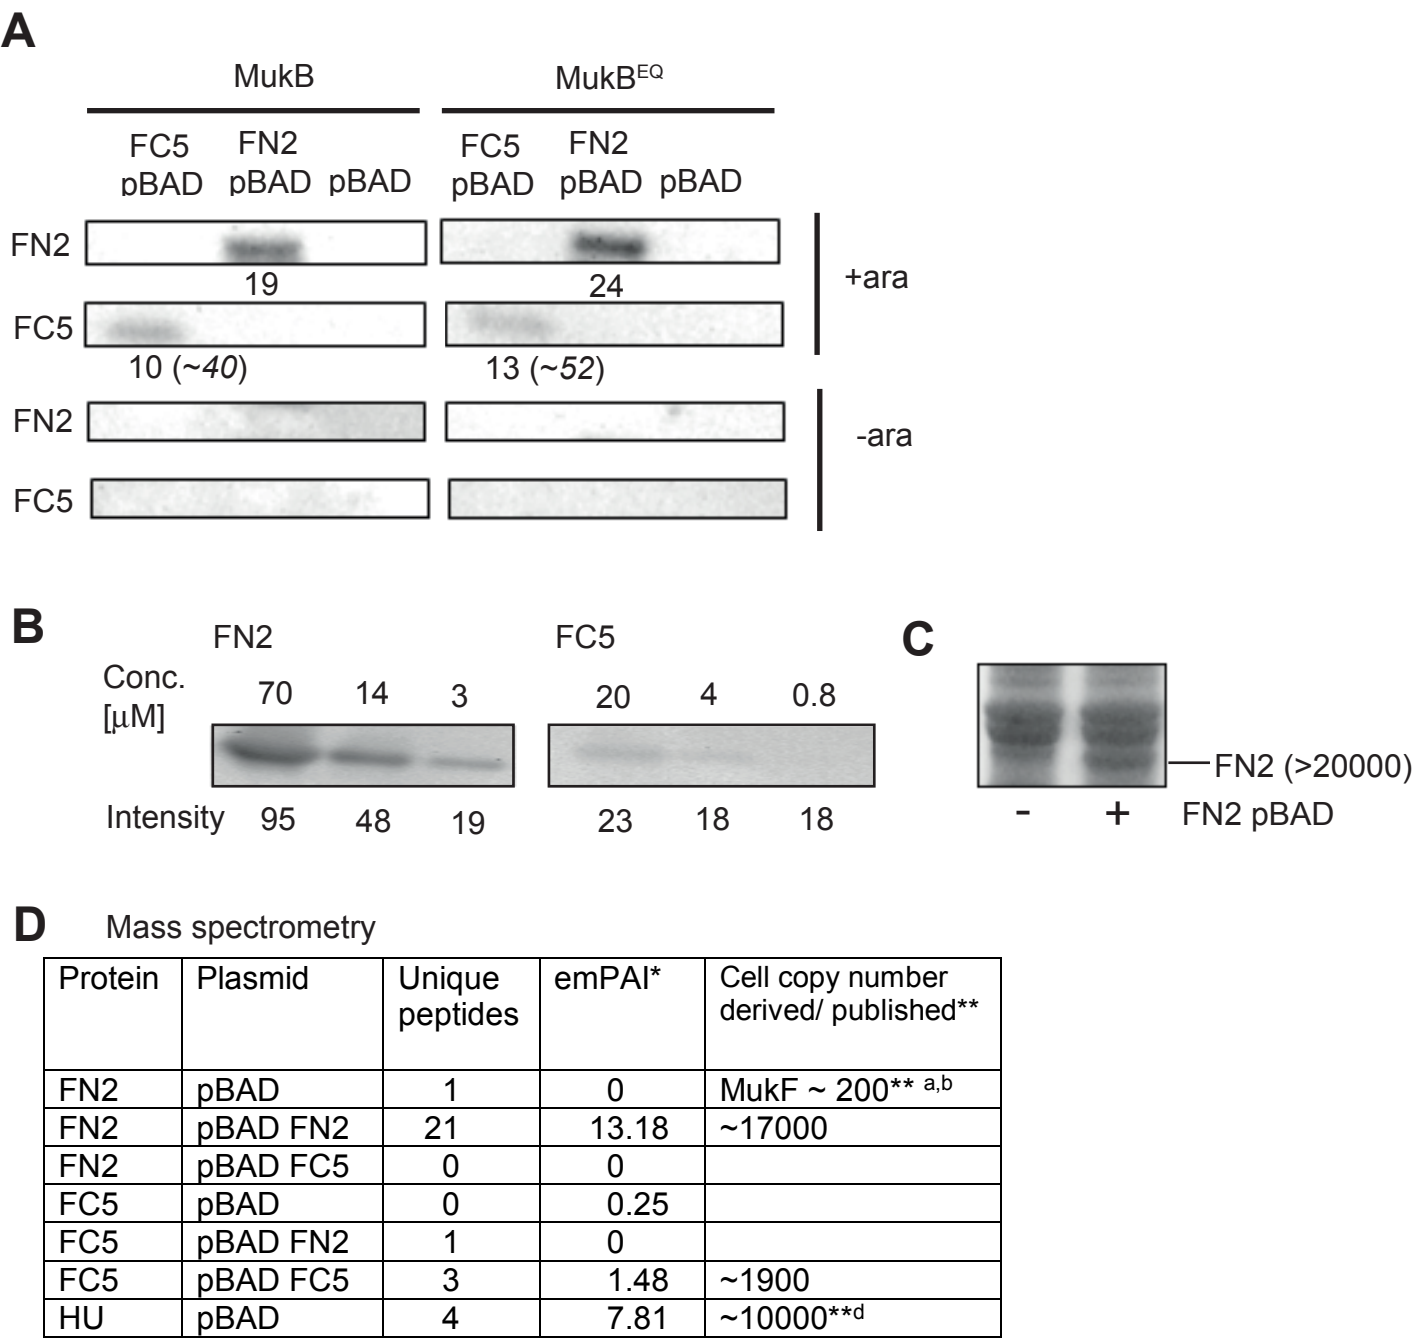

Figure 8 - figure supplement 2; Zawadzka et al.,

Supplement: supp [file elife-31522-supp-v1.zip › elife_poa_e31522_Figure_8_figure_supplement_2.pdf]

**A**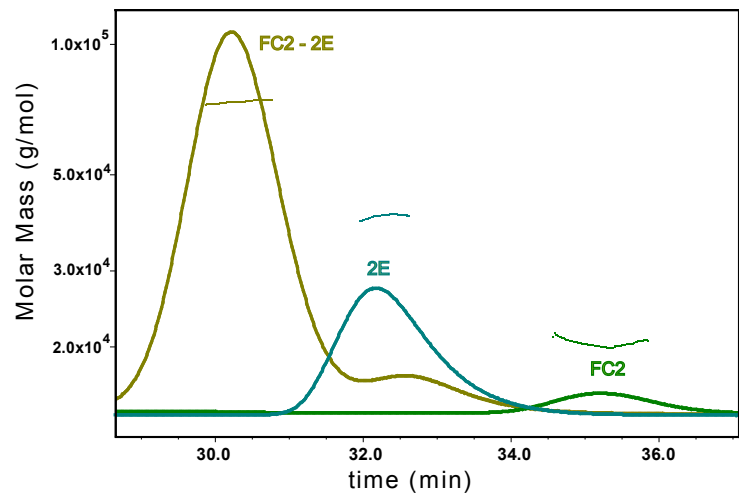**B**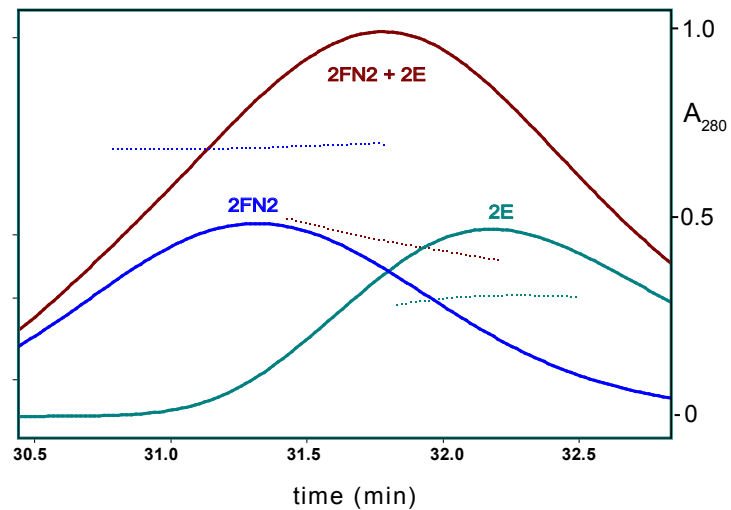

Figure 7 - figure supplement 1. Zawadzka et al.

Supplement: supp [file elife-31522-supp-v1.zip › elife_poa_e31522_Figure_7_figure_supplement_1.pdf]

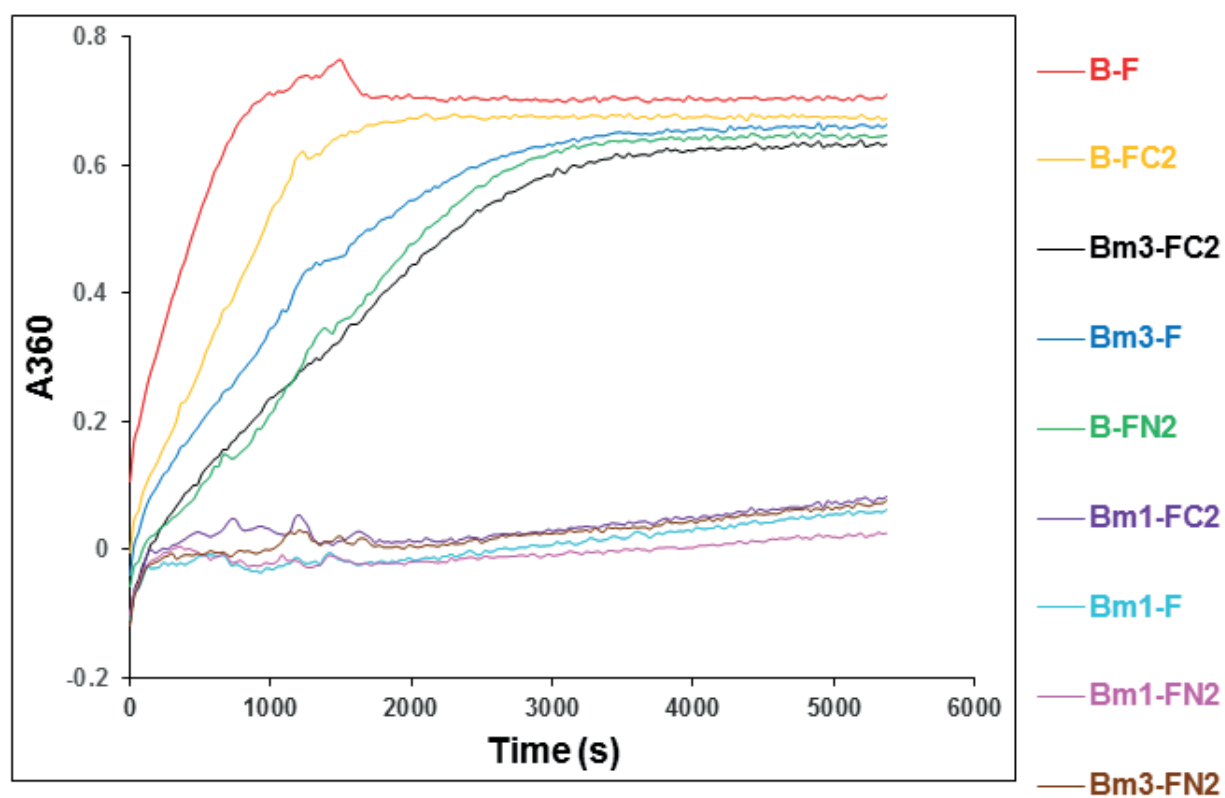

Figure 5 - figure supplement 3; Zawadzka et al.

Supplement: supp [file elife-31522-supp-v1.zip › elife_poa_e31522_Figure_5_figure_supplement_3.pdf]

**A**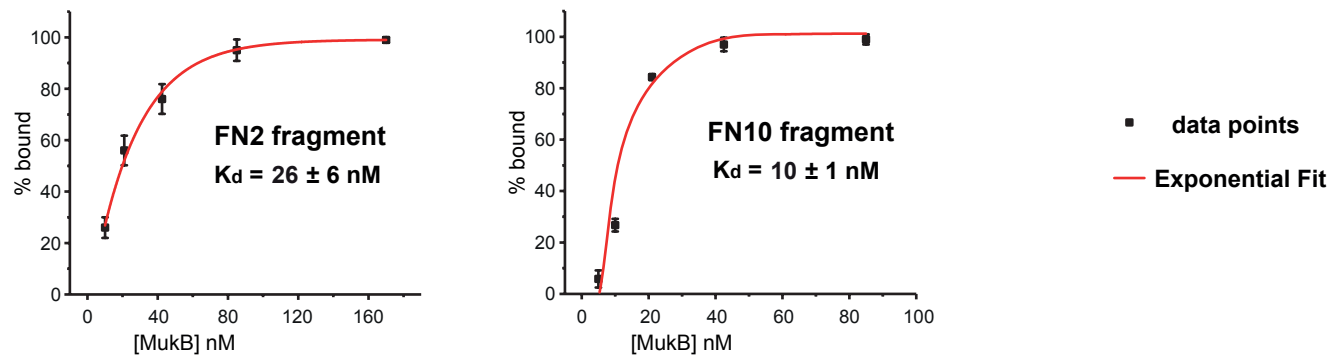**B**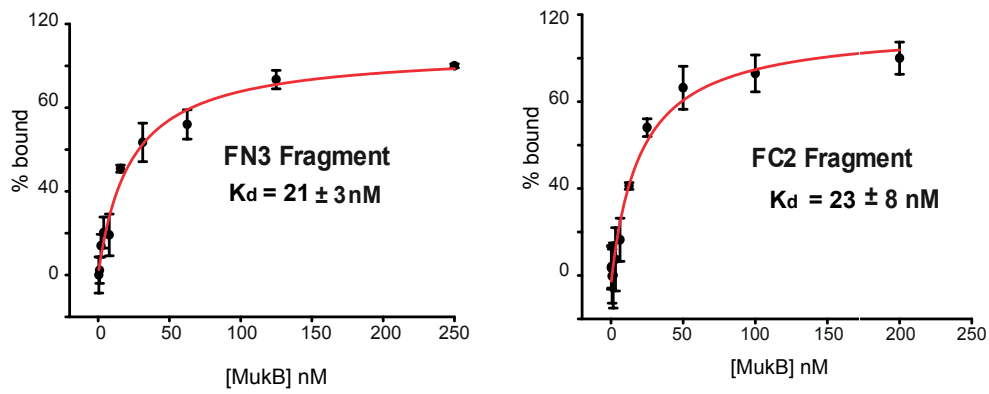

Figure 3 - figure supplement 3; Zawadzka et al.

Supplement: supp [file elife-31522-supp-v1.zip › elife_poa_e31522_Figure_3_figure_supplement_3.pdf]

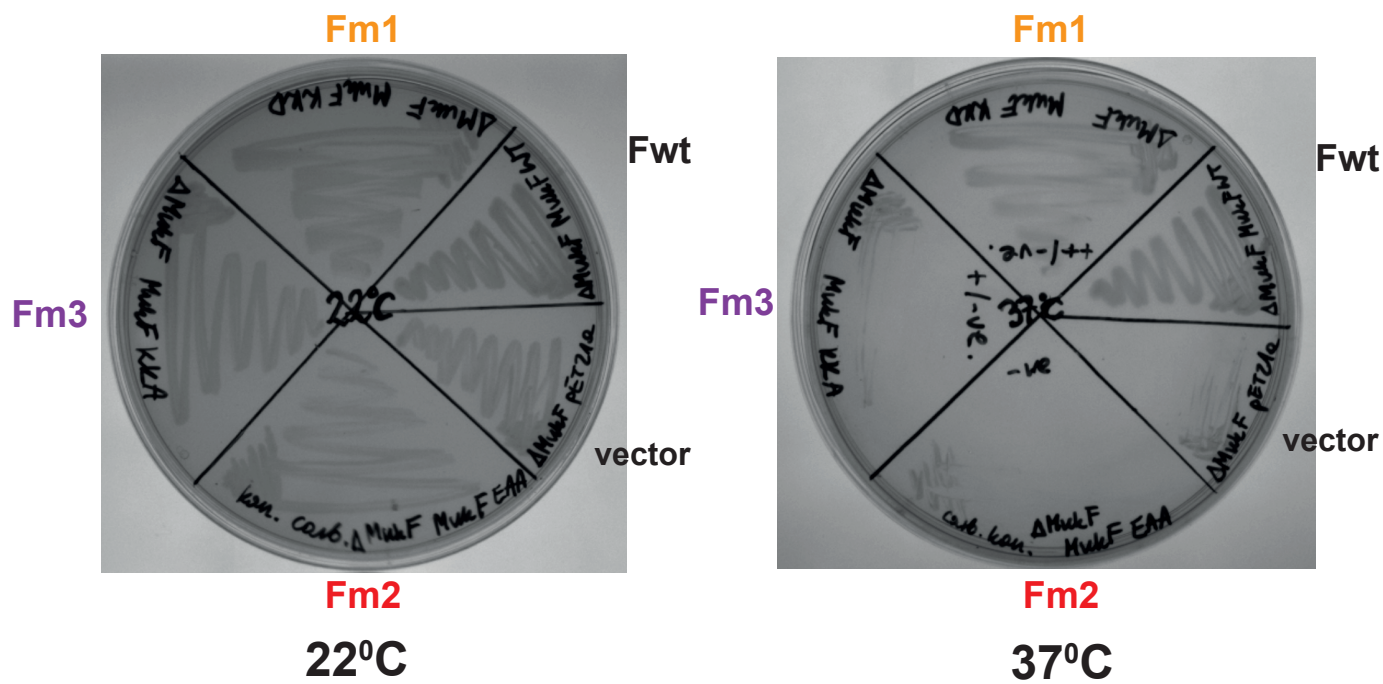

Figure 5 - figure supplement 2; Zawadzka et al.

Supplement: supp [file elife-31522-supp-v1.zip › elife_poa_e31522_Figure_5_figure_supplement_2.pdf]

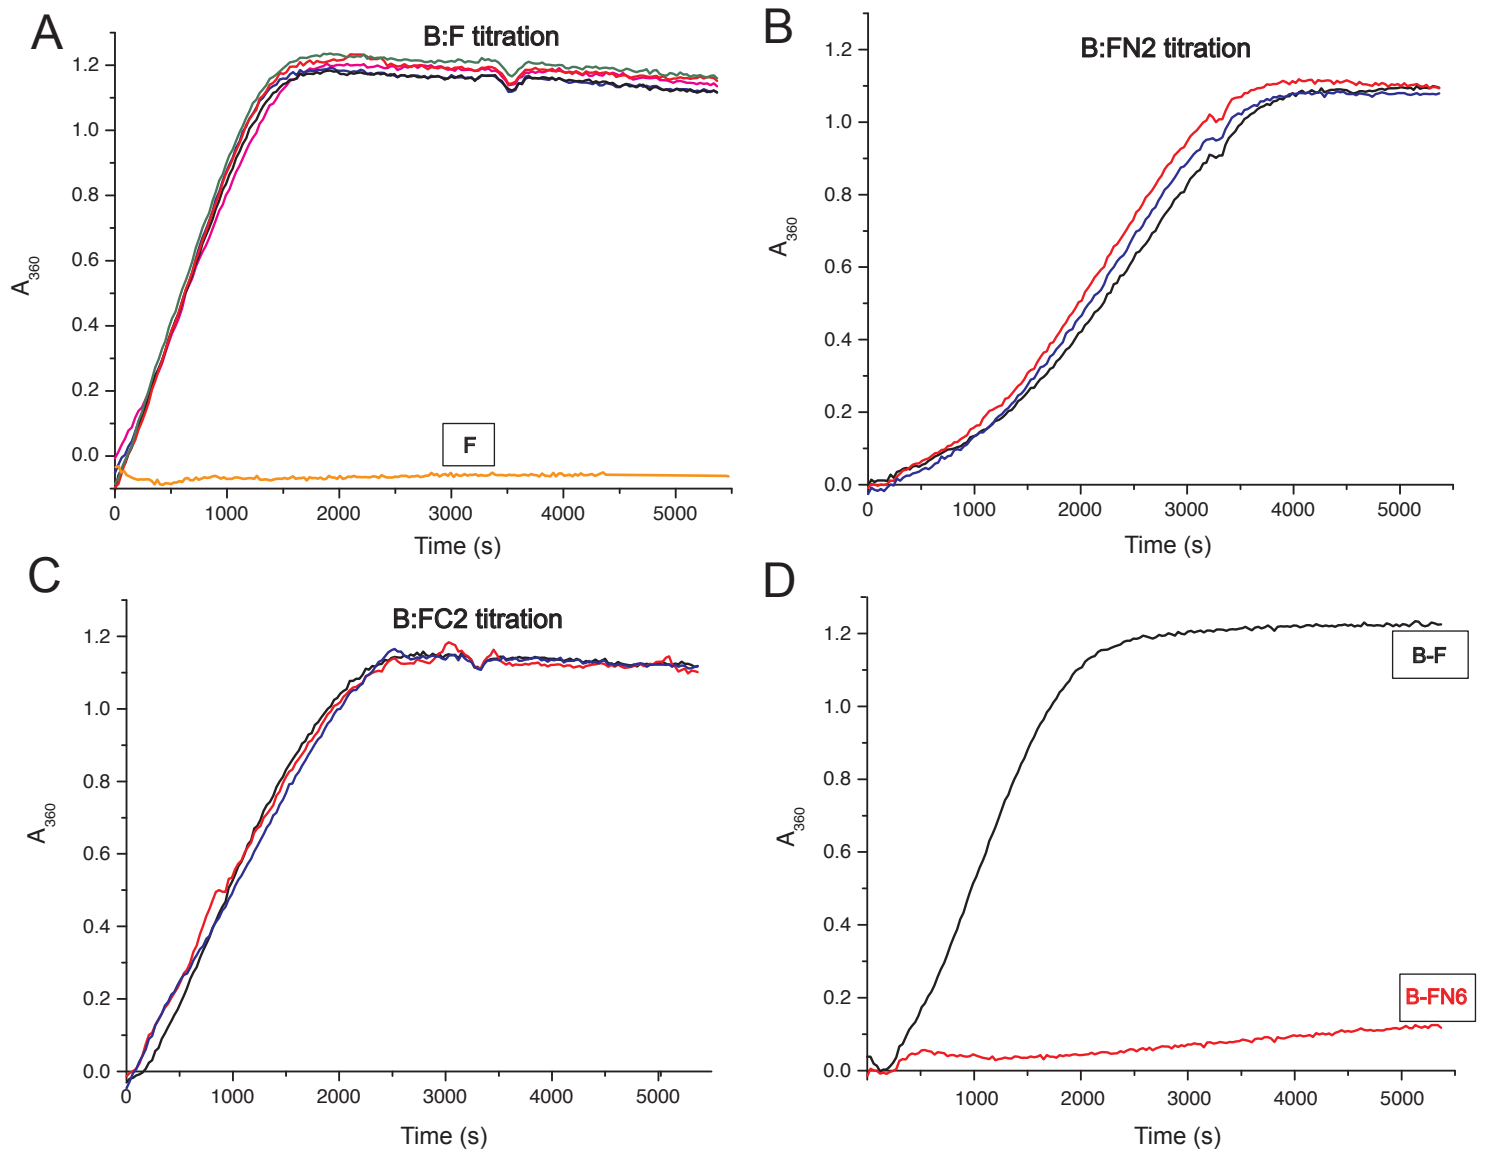

Figure 4 - figure supplement 1; Zawadzka et al.

Supplement: supp [file elife-31522-supp-v1.zip › elife_poa_e31522_Figure_4_figure_supplement_1.pdf]
